# Supplementary material for: Switch in regioselectivity of epoxide ring-opening by changing the organometallic reagent
Source: Royal Society of Chemistry journal article supplement (doi:10.1039/c1ob06216f), 2011-01-01
Supplement: c1ob06216f.pdf [file c1ob06216f.pdf]

# Switch in regioselectivity of epoxide ring-opening by changing the organometallic reagent

José A. Gálvez,<sup>a\*</sup> María D. Díaz de Villegas,<sup>a\*</sup> Ramón Badorrey,<sup>a</sup> and Pilar López-Ram-de-Víu<sup>a</sup>

<sup>a</sup> Departamento de Química Orgánica, Instituto de Ciencia de Materiales de Aragón, Instituto Universitario de Catálisis Homogénea, Universidad de Zaragoza-CSIC, E-50009 Zaragoza, Spain. Fax: +34976761202; Tel: +34976762274; E-mail: [loladiaz@unizar.es](mailto:loladiaz@unizar.es).

## Table of contents

|                                                                                |    |
|--------------------------------------------------------------------------------|----|
| <sup>1</sup> H NMR and <sup>13</sup> C NMR spectra for compound <i>syn-2b</i>  | 2  |
| <sup>1</sup> H NMR and <sup>13</sup> C NMR spectra for compound <i>anti-2b</i> | 3  |
| <sup>1</sup> H NMR and <sup>13</sup> C NMR spectra for compound <b>3</b>       | 4  |
| <sup>1</sup> H NMR and <sup>13</sup> C NMR spectra for compound <b>4</b>       | 5  |
| <sup>1</sup> H NMR and <sup>13</sup> C NMR spectra for compound <b>5</b>       | 6  |
| <sup>1</sup> H NMR and <sup>13</sup> C NMR spectra for compound <b>6</b>       | 7  |
| <sup>1</sup> H NMR and <sup>13</sup> C NMR spectra for compound <b>7a</b>      | 8  |
| <sup>1</sup> H NMR and <sup>13</sup> C NMR spectra for compound <b>7b</b>      | 9  |
| <sup>1</sup> H NMR and <sup>13</sup> C NMR spectra for compound <b>7b</b>      | 10 |
| <sup>1</sup> H NMR and <sup>13</sup> C NMR spectra for compound <b>8a</b>      | 11 |
| <sup>1</sup> H NMR and <sup>13</sup> C NMR spectra for compound <b>8b</b>      | 12 |
| <sup>1</sup> H NMR and <sup>13</sup> C NMR spectra for compound <b>8d</b>      | 13 |
| <sup>1</sup> H NMR and <sup>13</sup> C NMR spectra for compound <b>8e</b>      | 14 |
| <sup>1</sup> H NMR and <sup>13</sup> C NMR spectra for compound <b>9a</b>      | 15 |
| <sup>1</sup> H NMR and <sup>13</sup> C NMR spectra for compound <b>9b</b>      | 16 |
| <sup>1</sup> H NMR and <sup>13</sup> C NMR spectra for compound <b>9d</b>      | 17 |
| <sup>1</sup> H NMR and <sup>13</sup> C NMR spectra for compound <b>9e</b>      | 18 |
| <sup>1</sup> H NMR and <sup>13</sup> C NMR spectra for compound <b>10</b>      | 19 |
| ORTEP drawing of compound <b>9e</b>                                            | 20 |

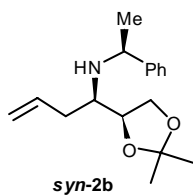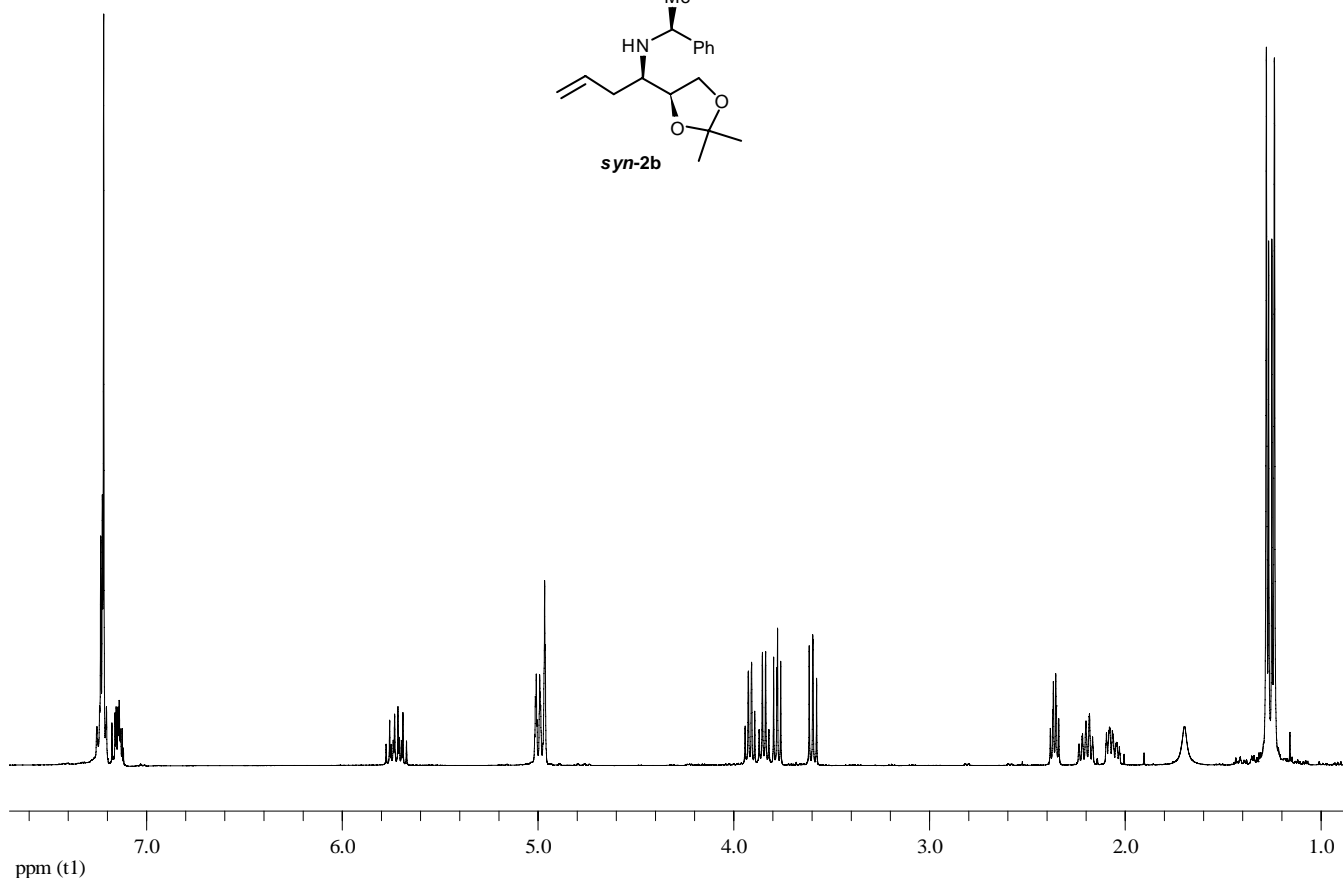

<sup>1</sup>H NMR 400 MHz, rt, CDCl<sub>3</sub>

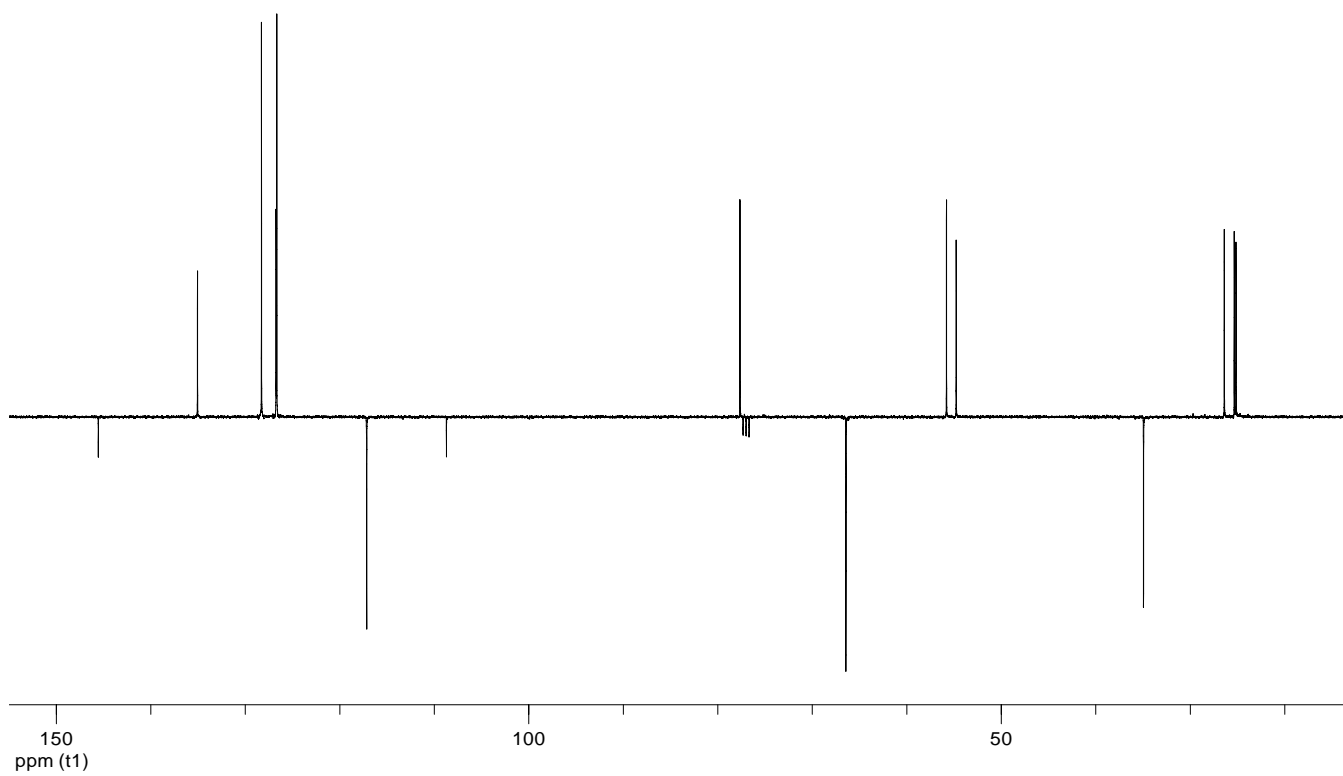

<sup>13</sup>C NMR 100 MHz, rt, CDCl<sub>3</sub>

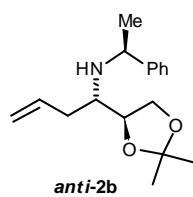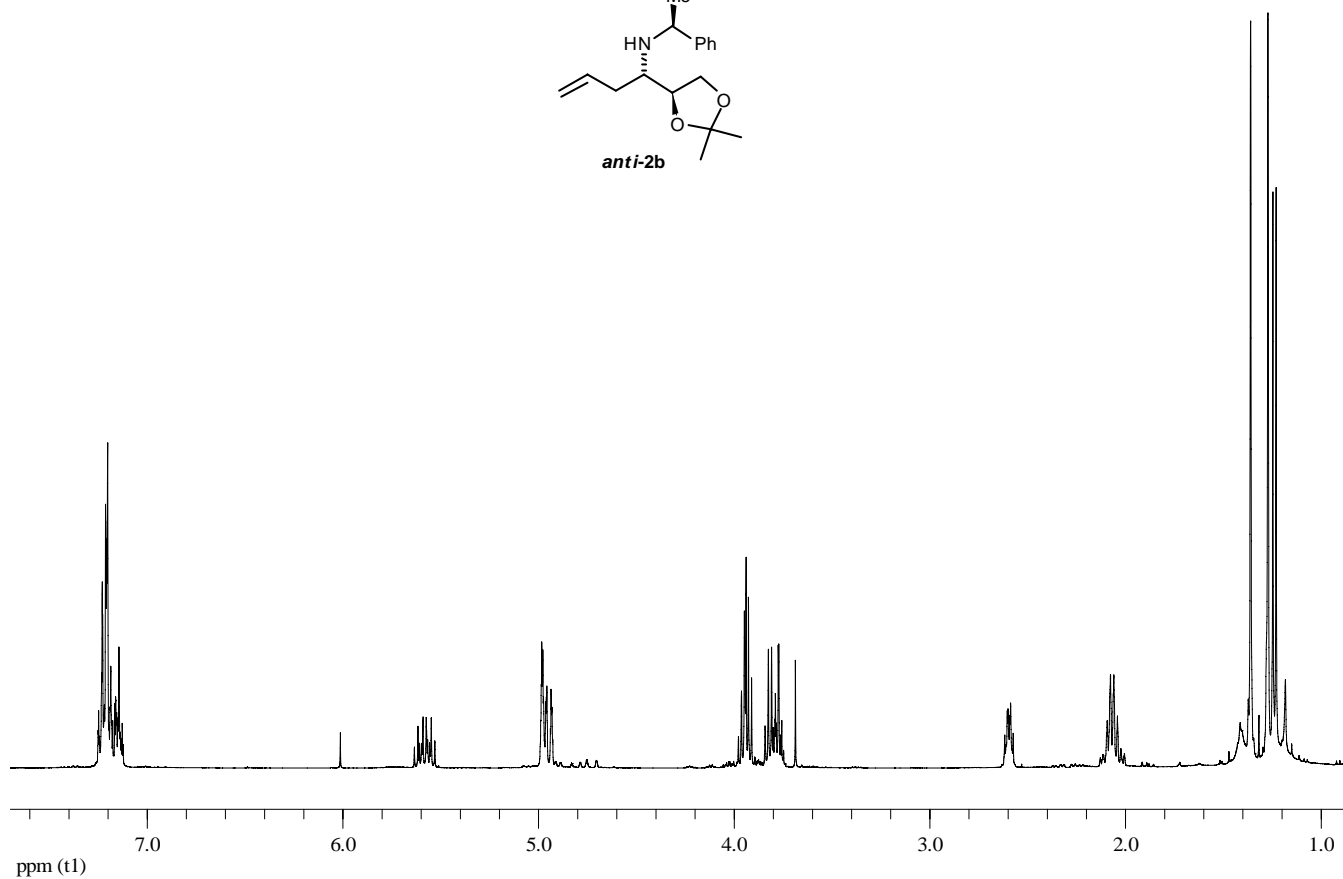

<sup>1</sup>H NMR 400 MHz, rt, CDCl<sub>3</sub>

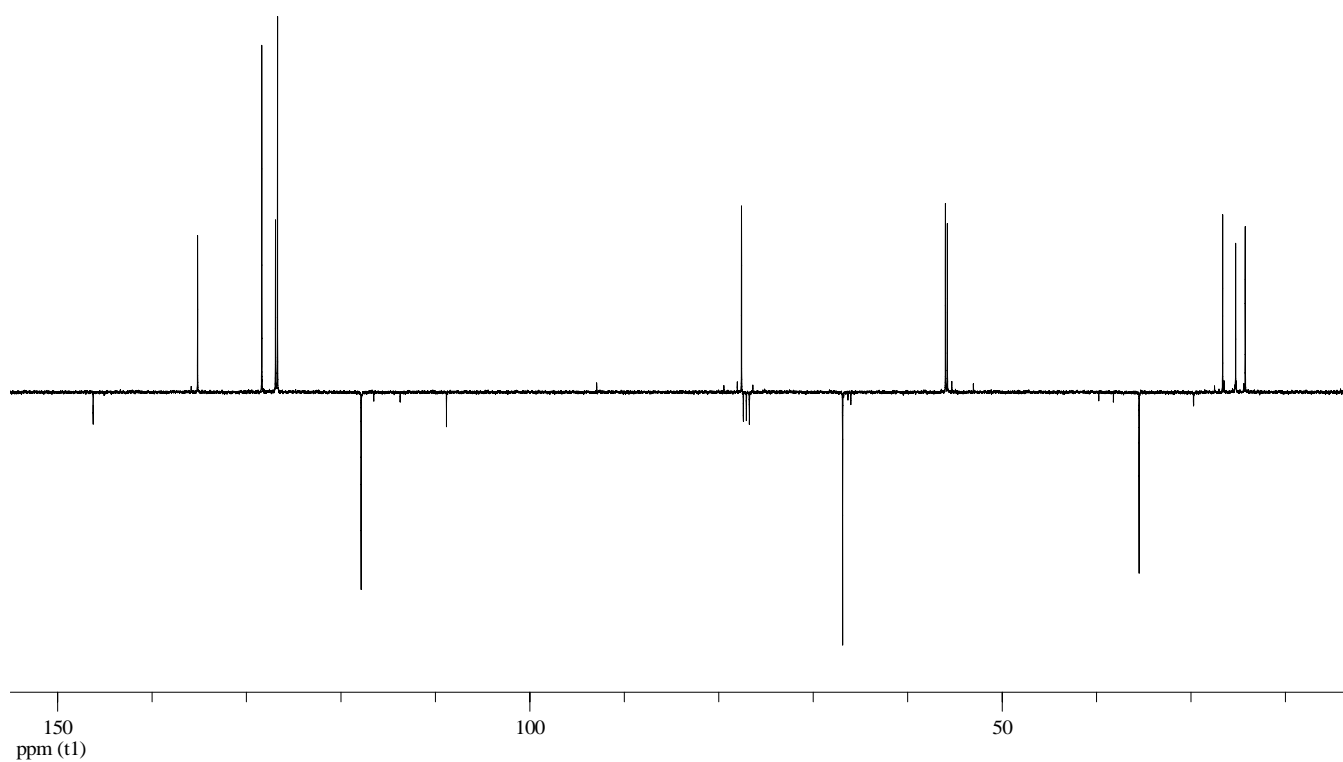

<sup>13</sup>C NMR 100 MHz, rt, CDCl<sub>3</sub>

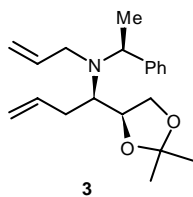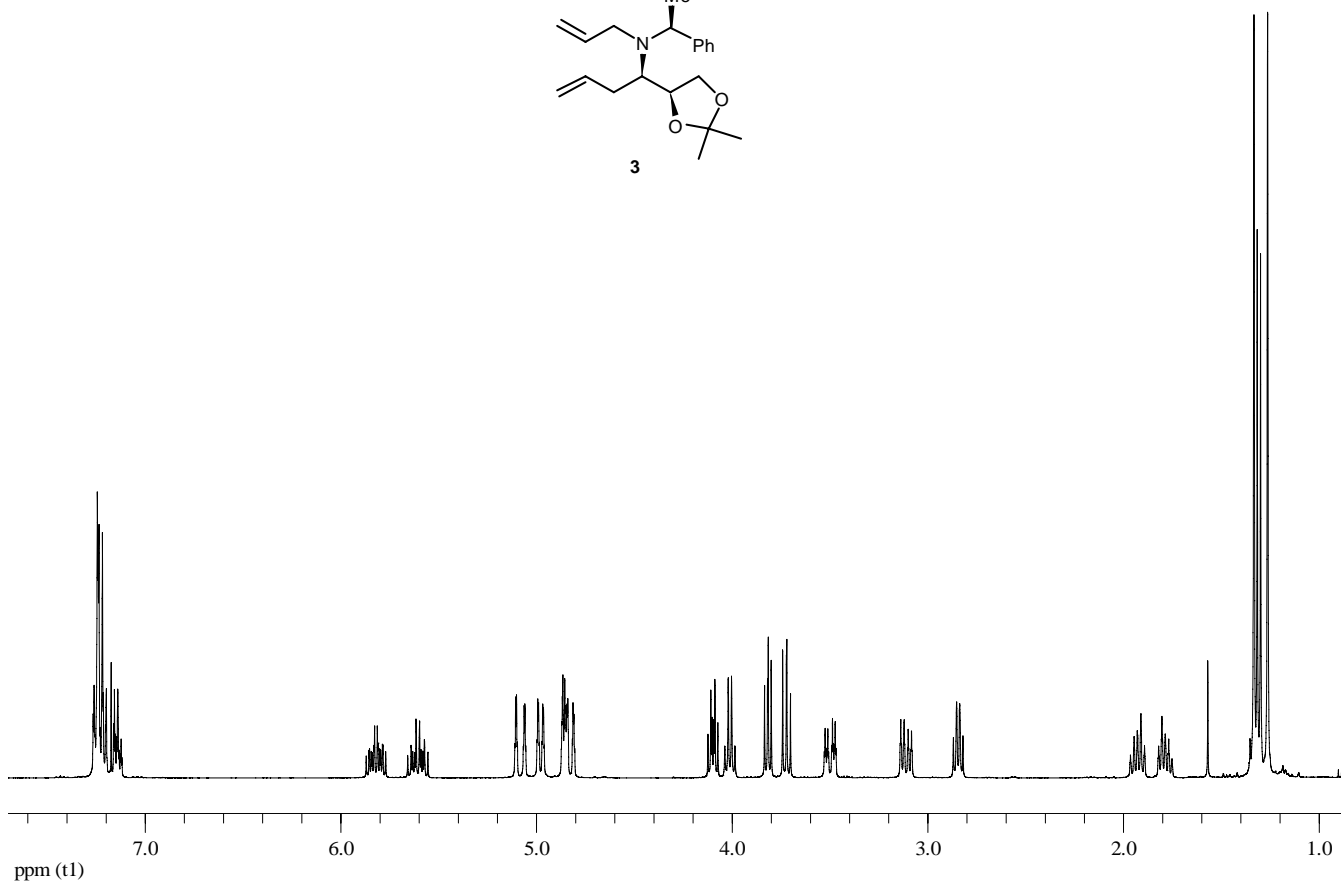

$^1\text{H}$  NMR 400 MHz, rt,  $\text{CDCl}_3$

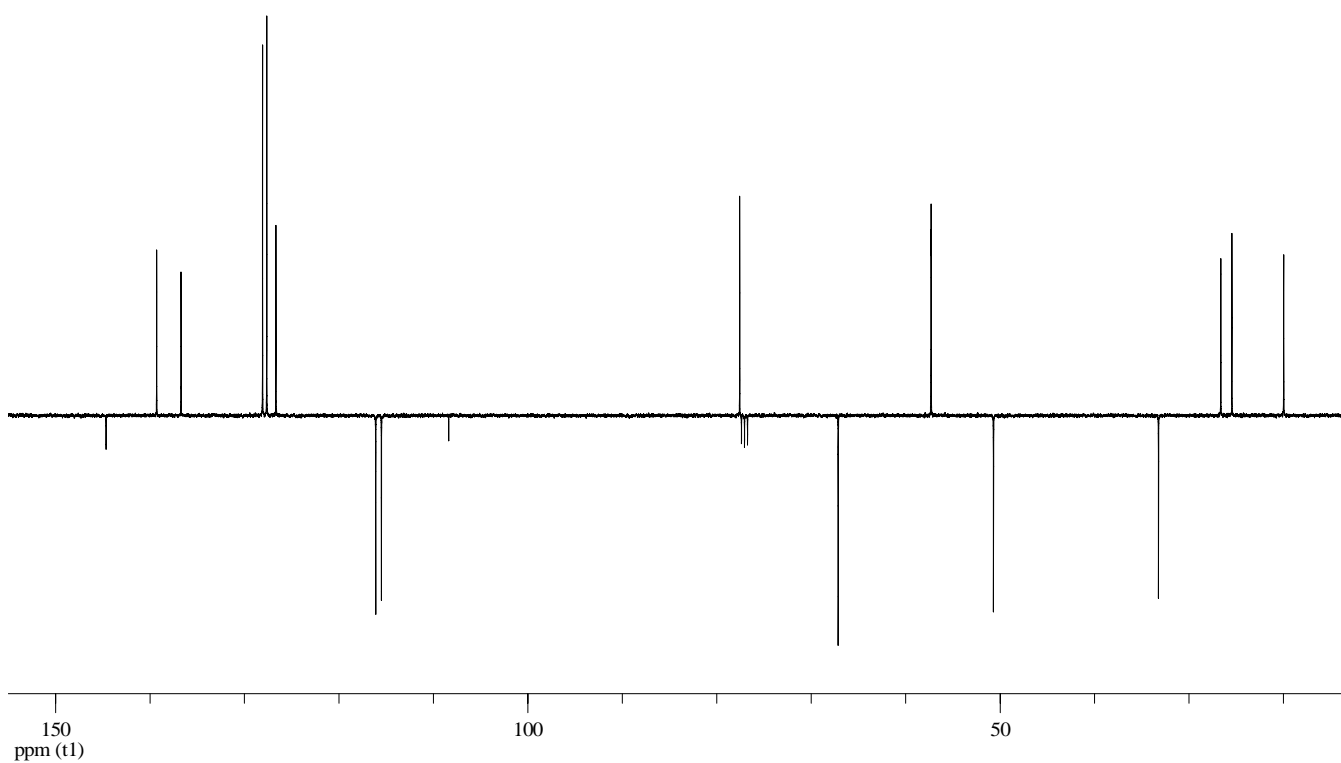

$^{13}\text{C}$  NMR 100 MHz, rt,  $\text{CDCl}_3$

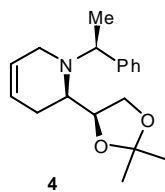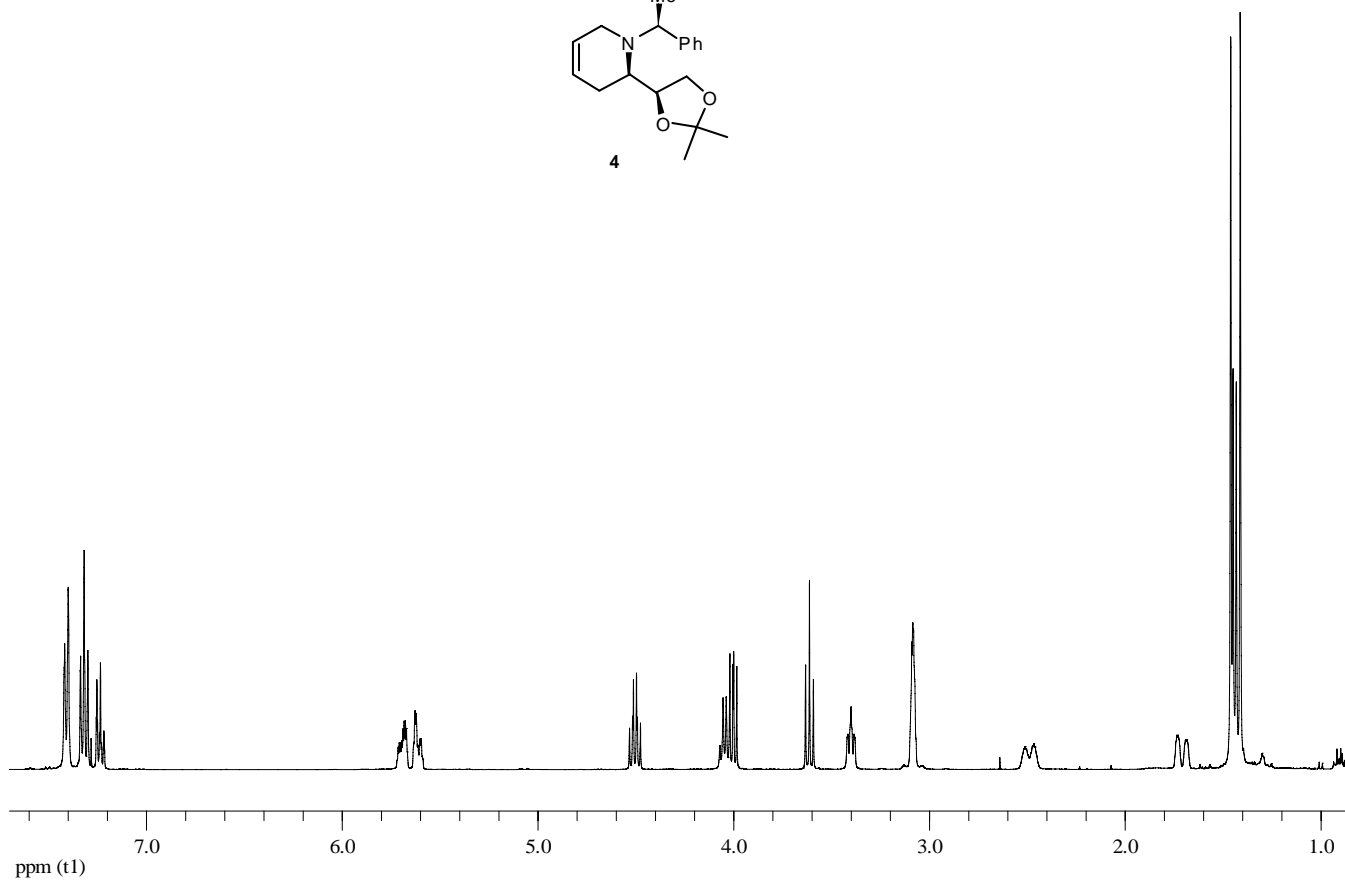

<sup>1</sup>H NMR 400 MHz, rt, CDCl<sub>3</sub>

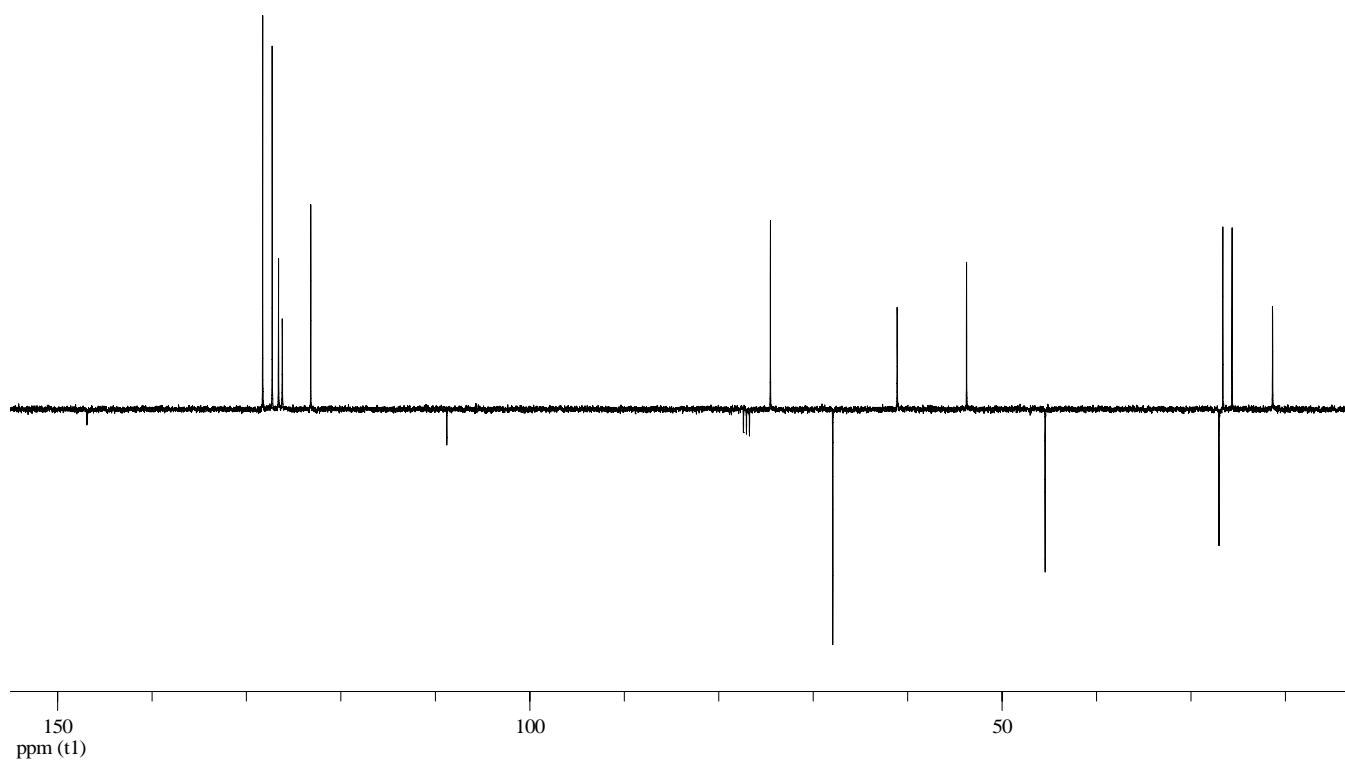

<sup>13</sup>C NMR 100 MHz, rt, CDCl<sub>3</sub>

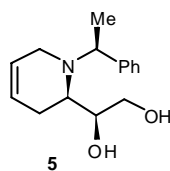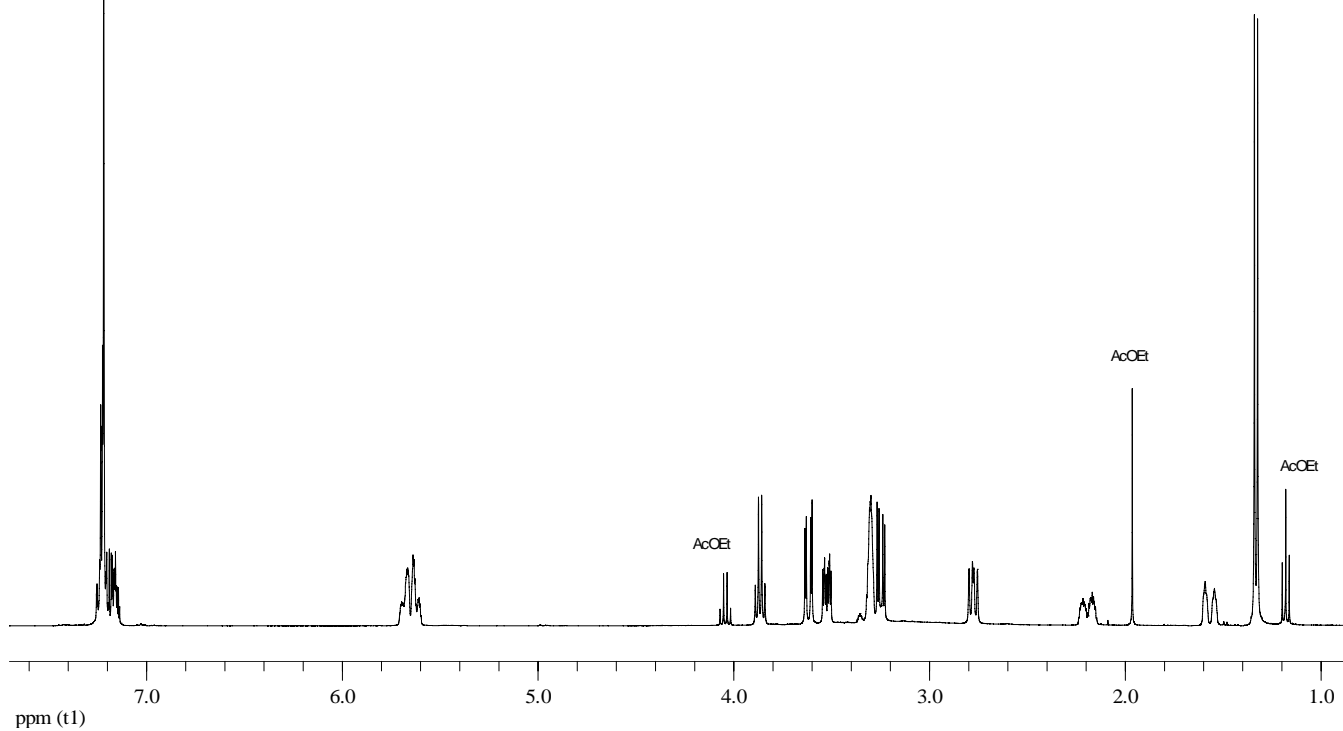

$^1\text{H}$  NMR 400 MHz, rt,  $\text{CDCl}_3$

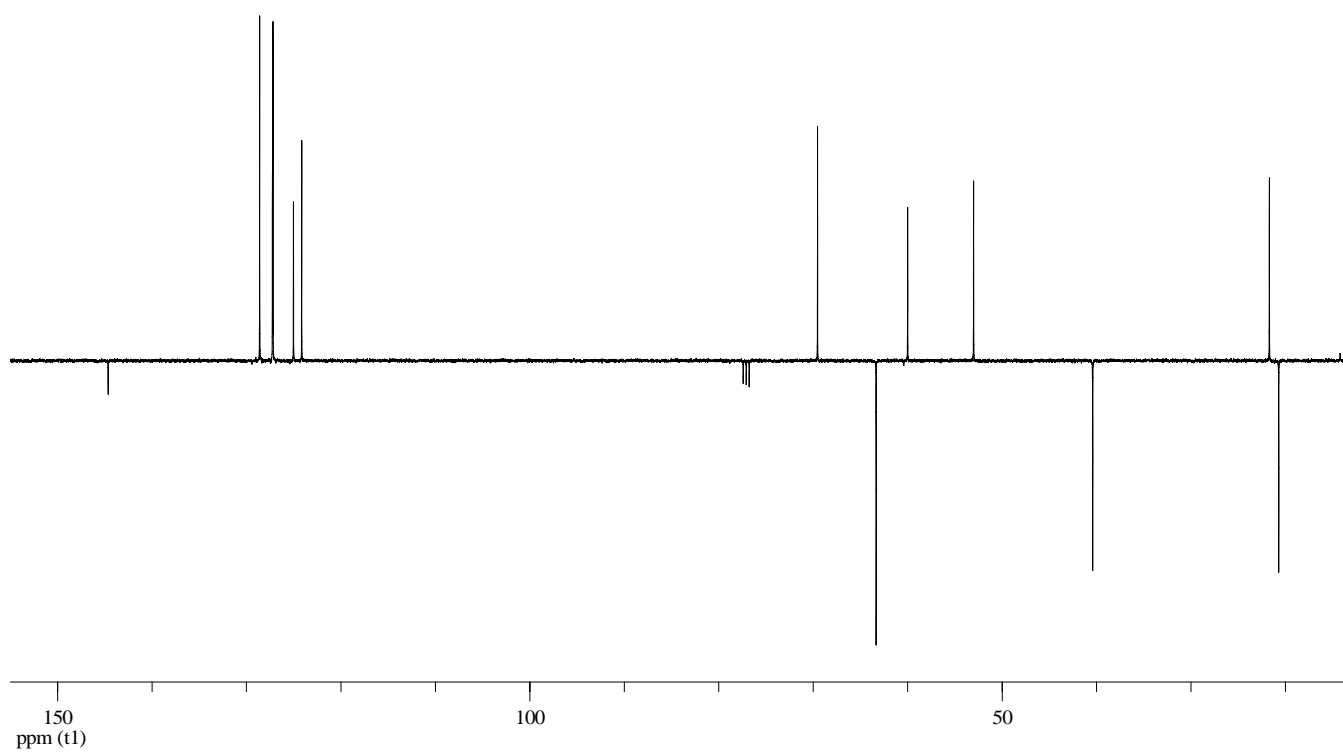

$^{13}\text{C}$  NMR 100 MHz, rt,  $\text{CDCl}_3$

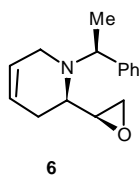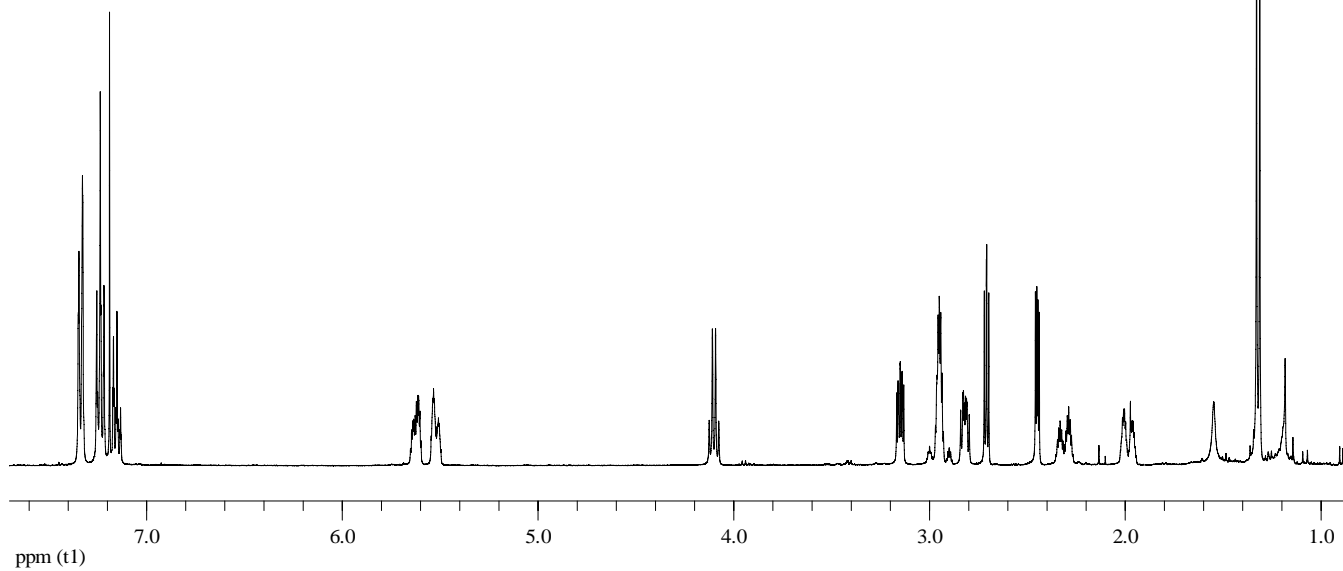

$^1\text{H}$  NMR 400 MHz, rt,  $\text{CDCl}_3$

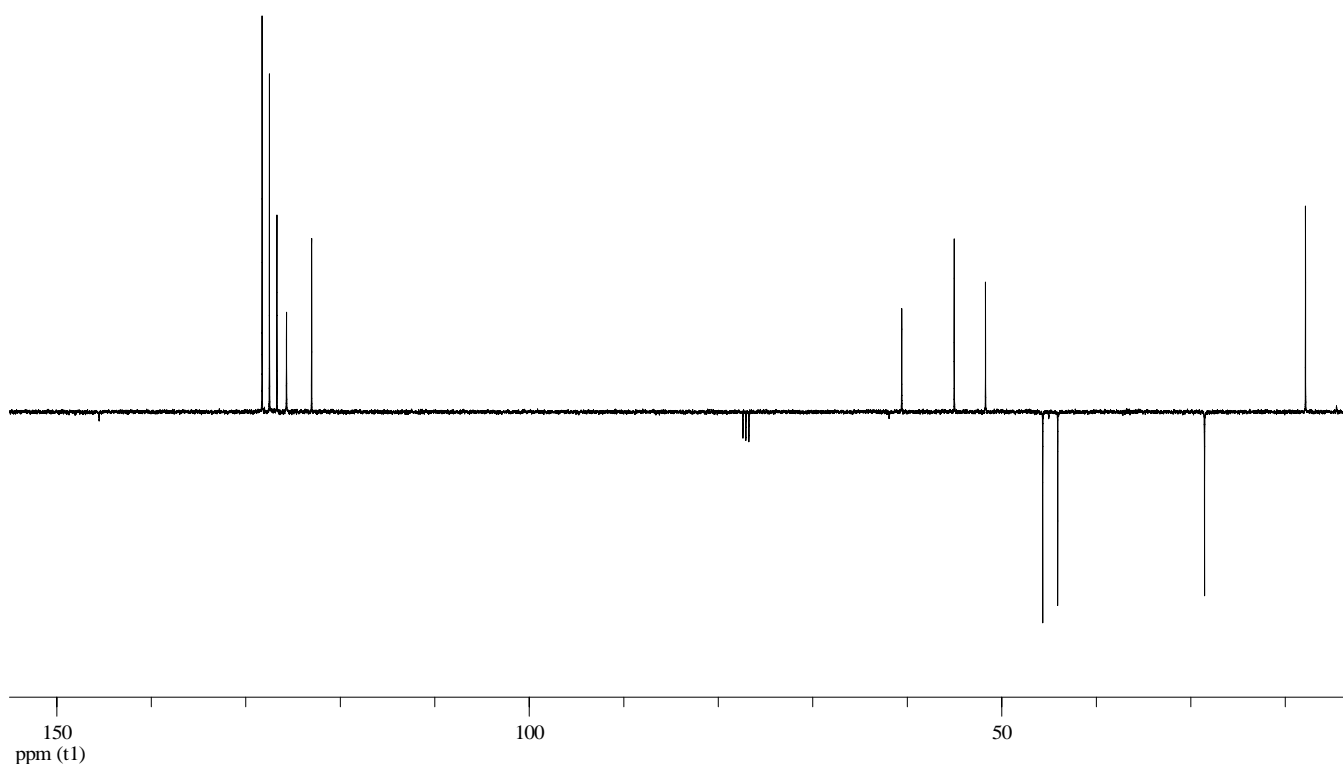

$^{13}\text{C}$  NMR 100 MHz, rt,  $\text{CDCl}_3$

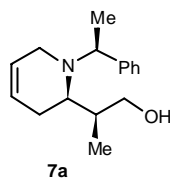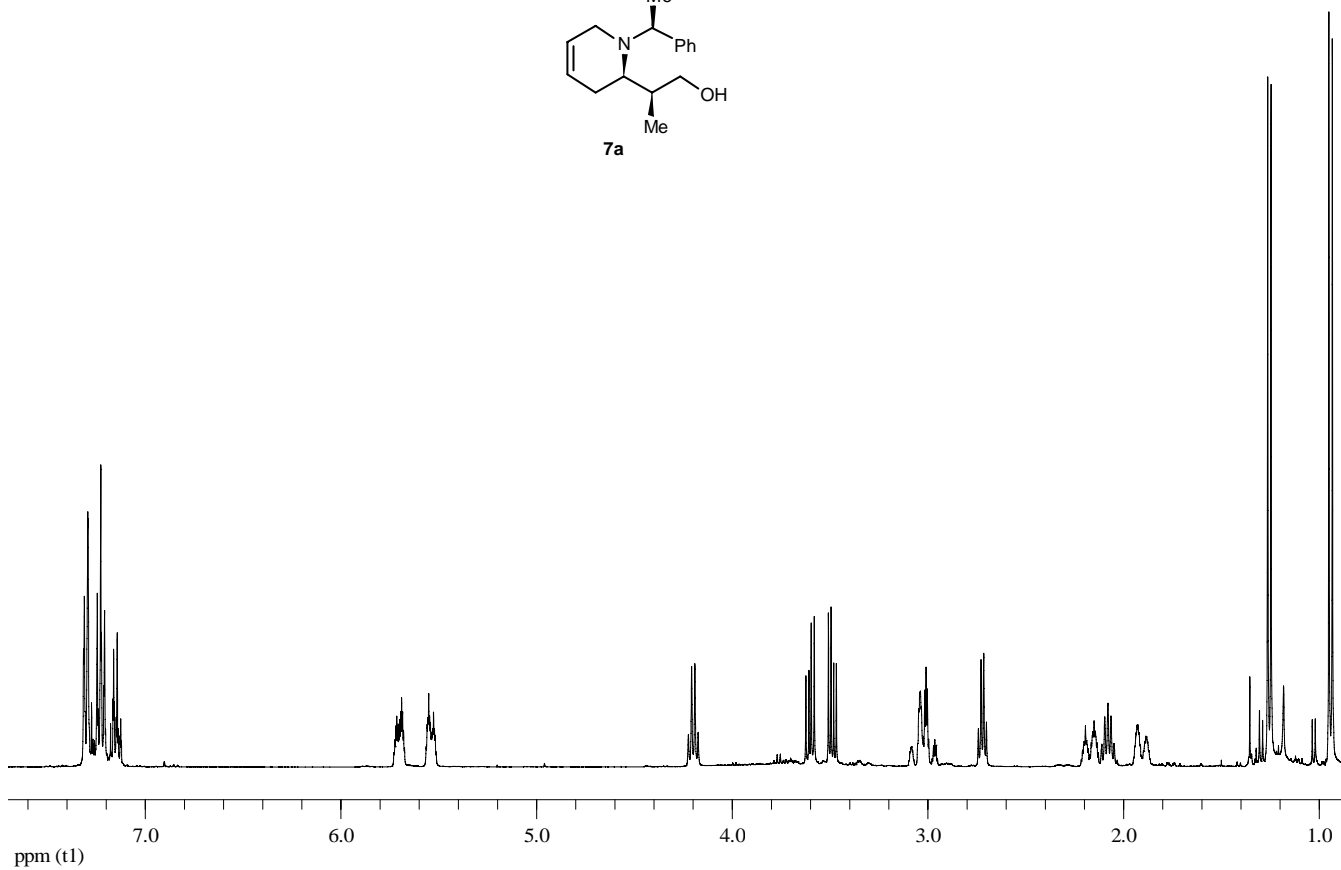

<sup>1</sup>H NMR 400 MHz, rt, CDCl<sub>3</sub>

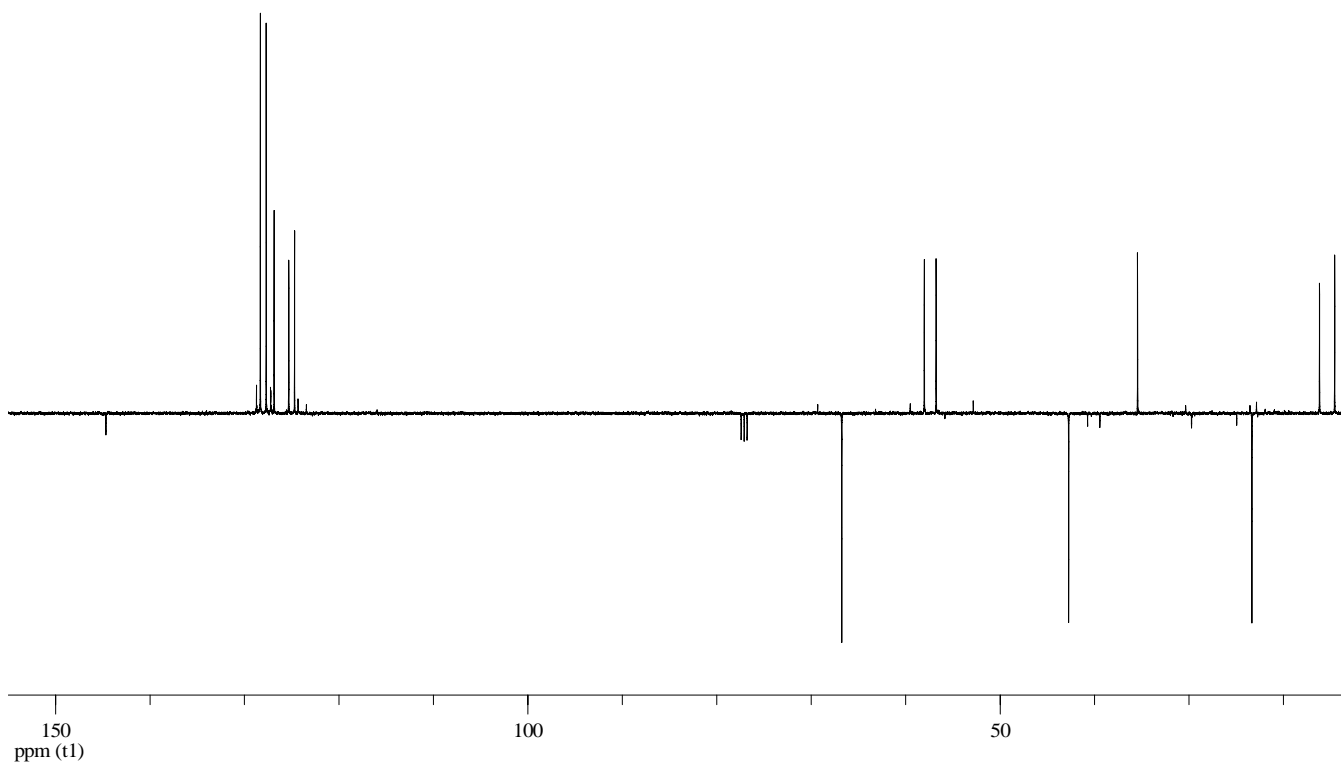

<sup>13</sup>C NMR 100 MHz, rt, CDCl<sub>3</sub>



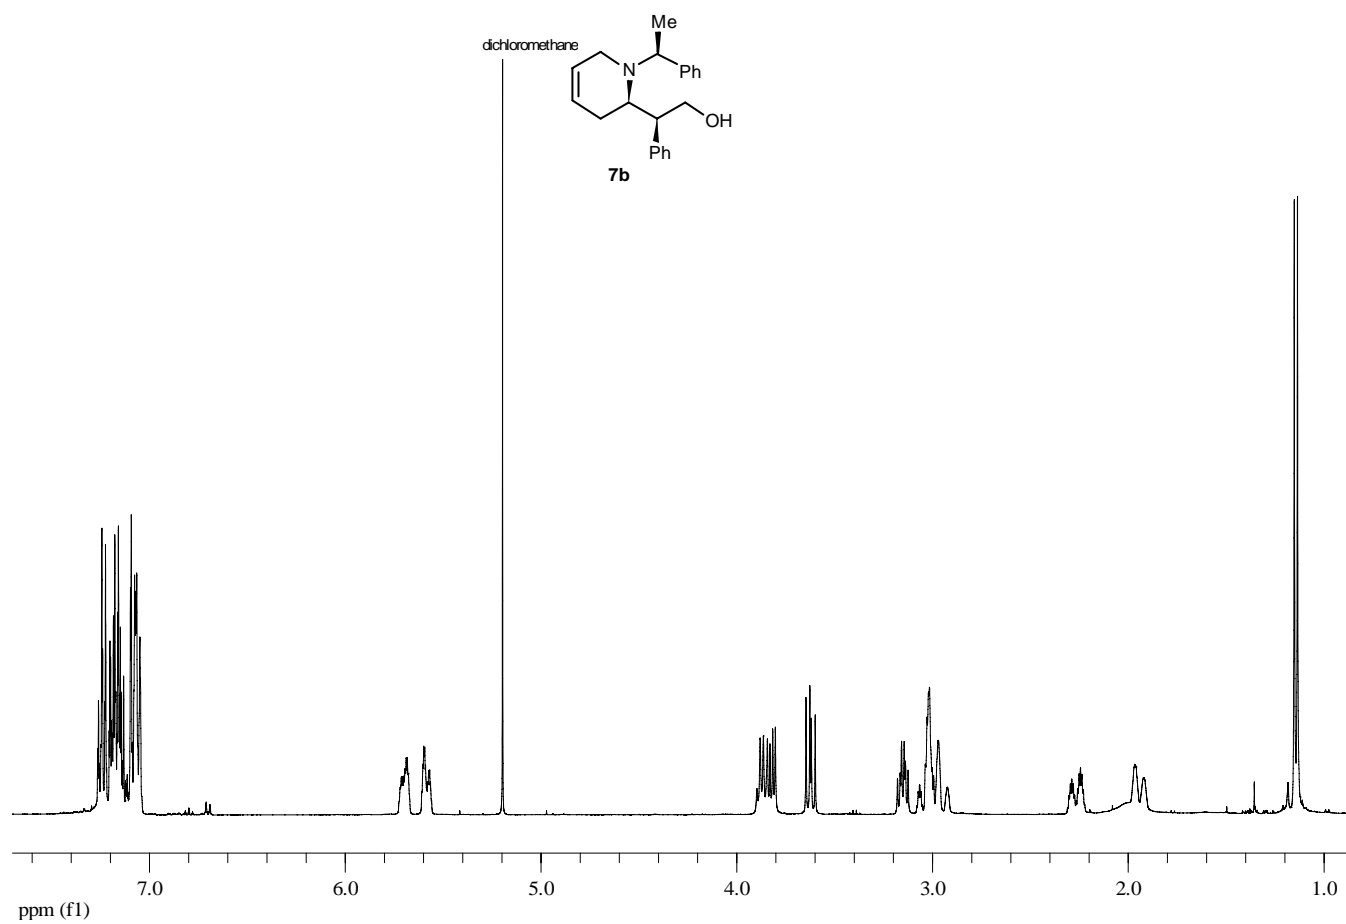

$^1\text{H}$  NMR 400 MHz, rt,  $\text{CDCl}_3$

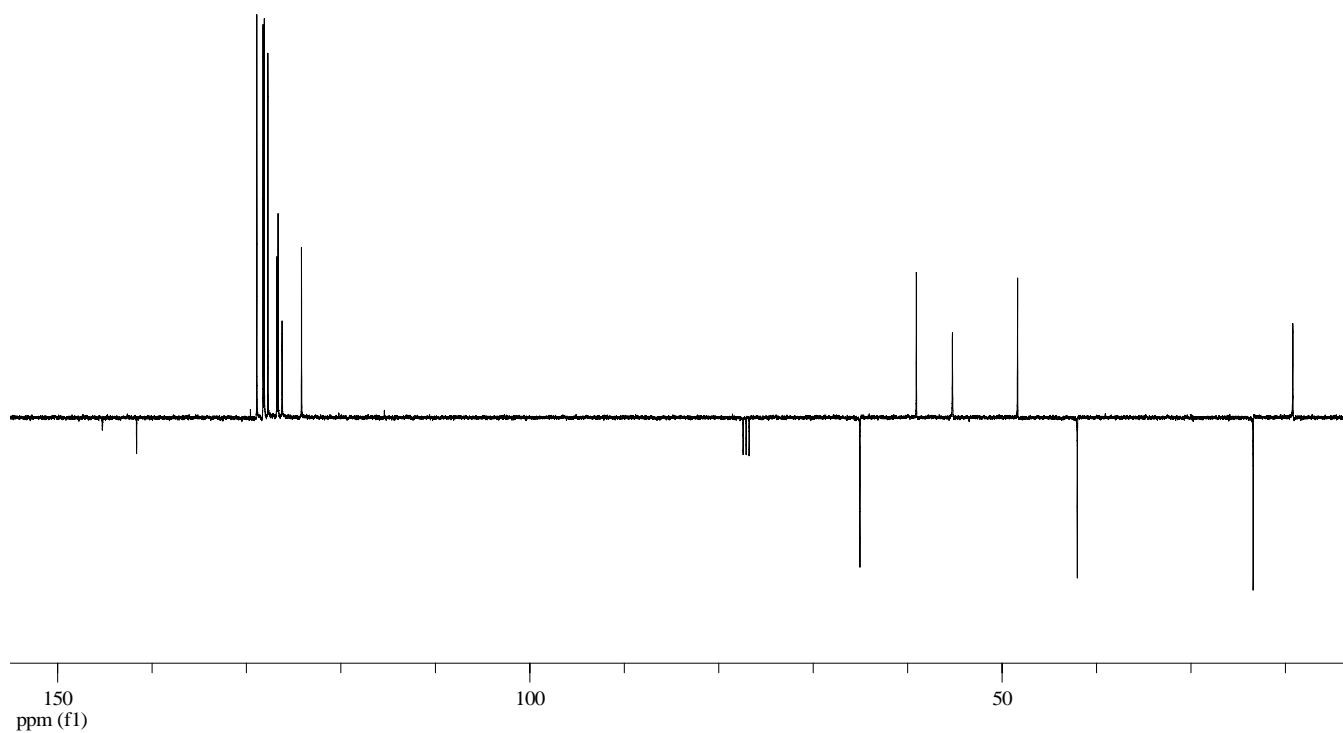

$^{13}\text{C}$  NMR 100 MHz, rt,  $\text{CDCl}_3$

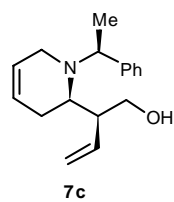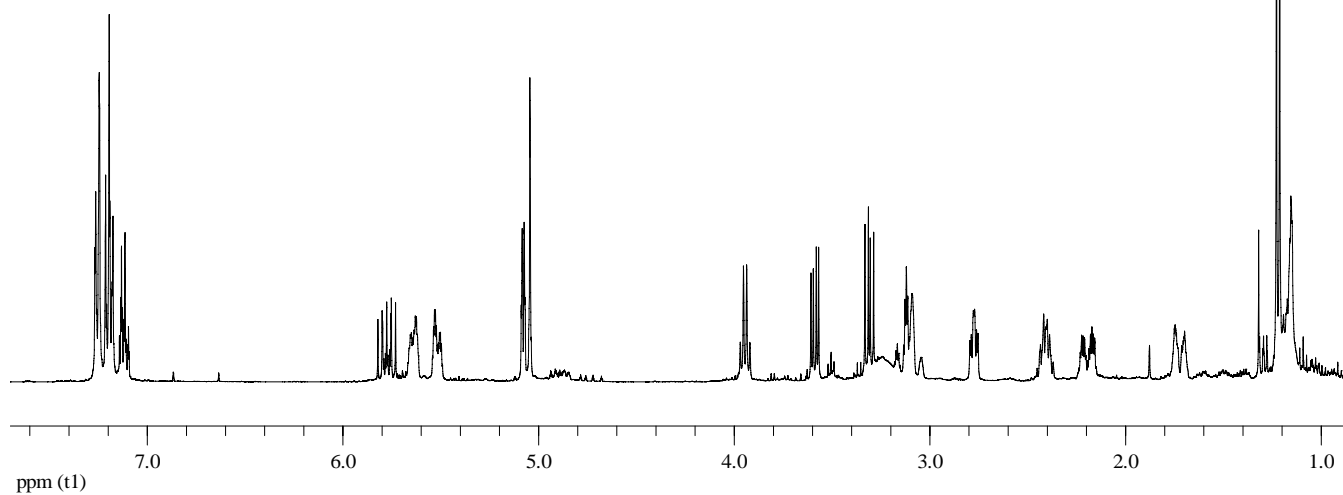

<sup>1</sup>H NMR 400 MHz, rt, CDCl<sub>3</sub>

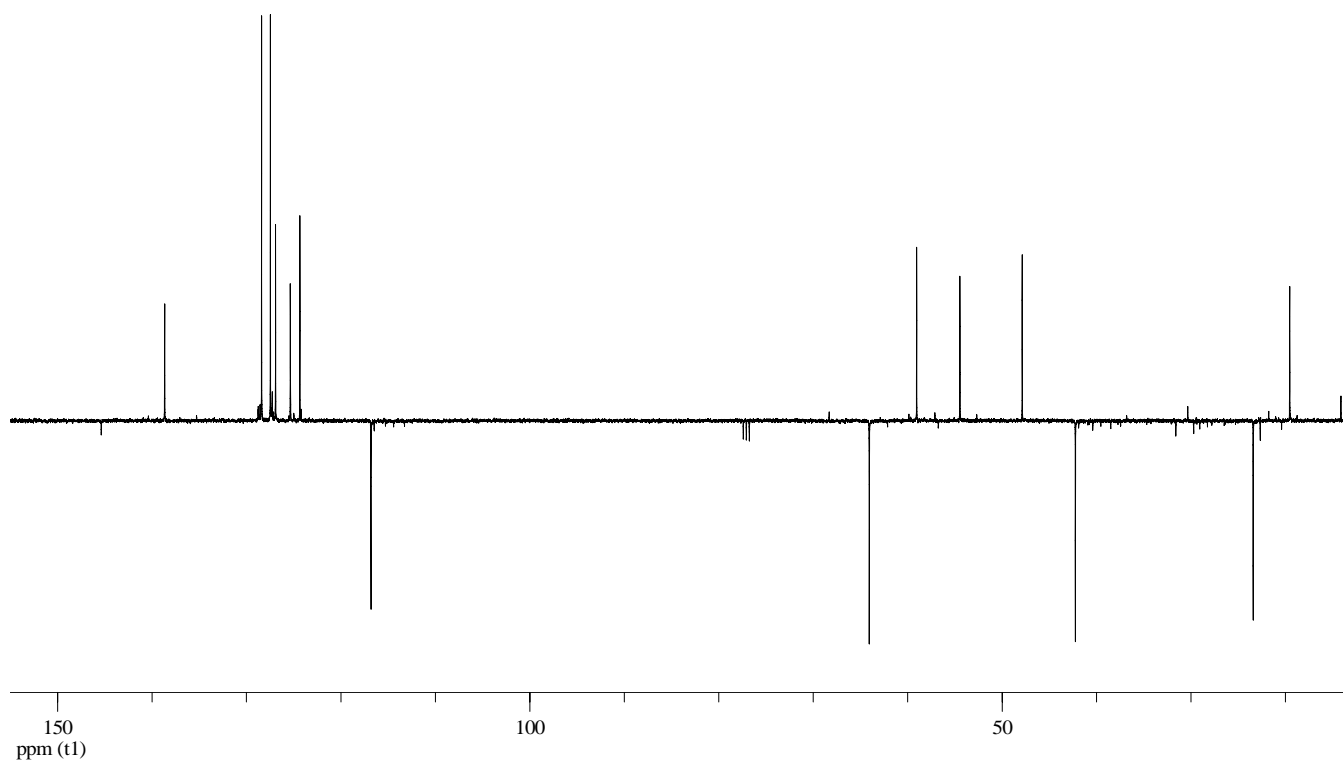

<sup>13</sup>C NMR 100 MHz, rt, CDCl<sub>3</sub>

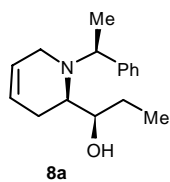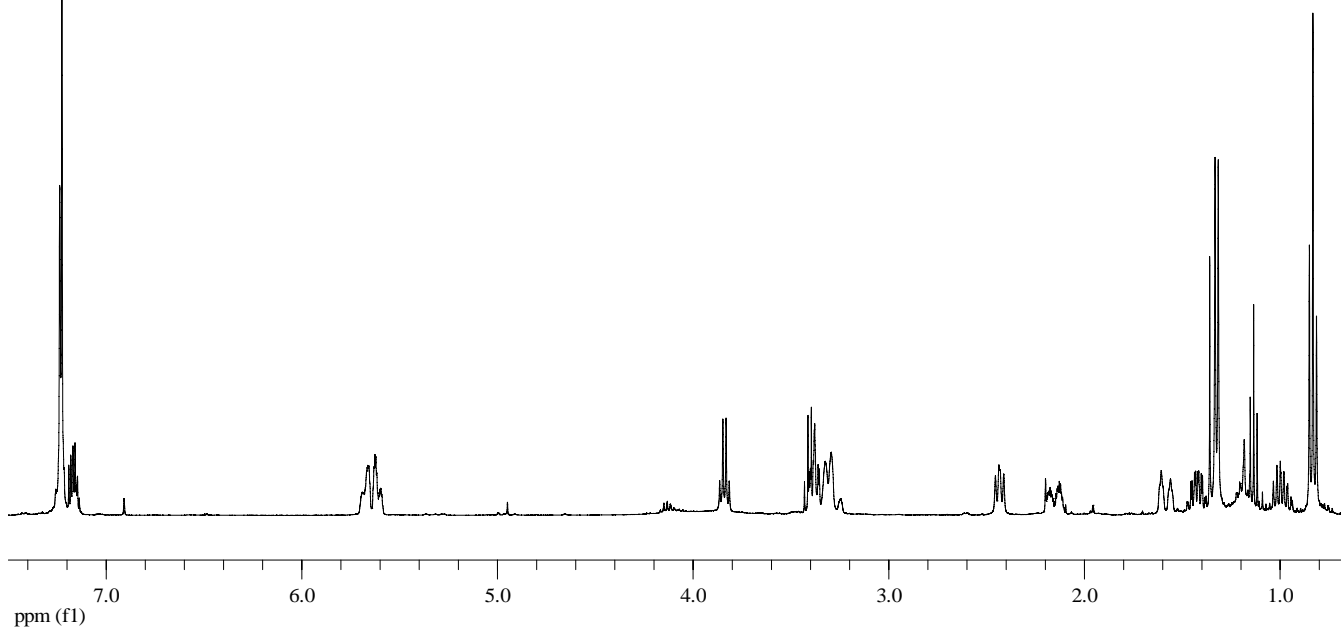

$^1\text{H}$  NMR 400 MHz, rt,  $\text{CDCl}_3$

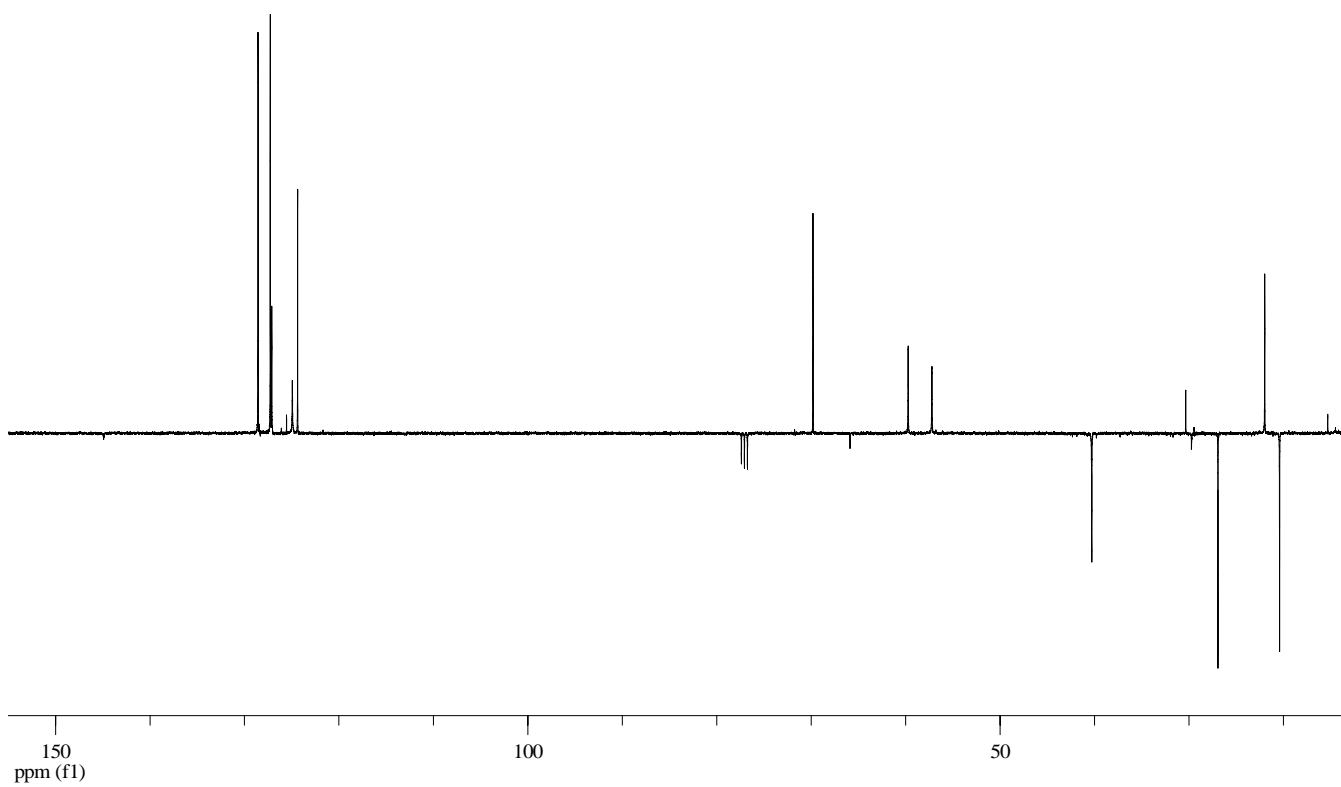

$^{13}\text{C}$  NMR 100 MHz, rt,  $\text{CDCl}_3$

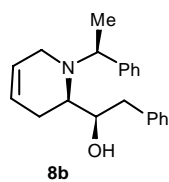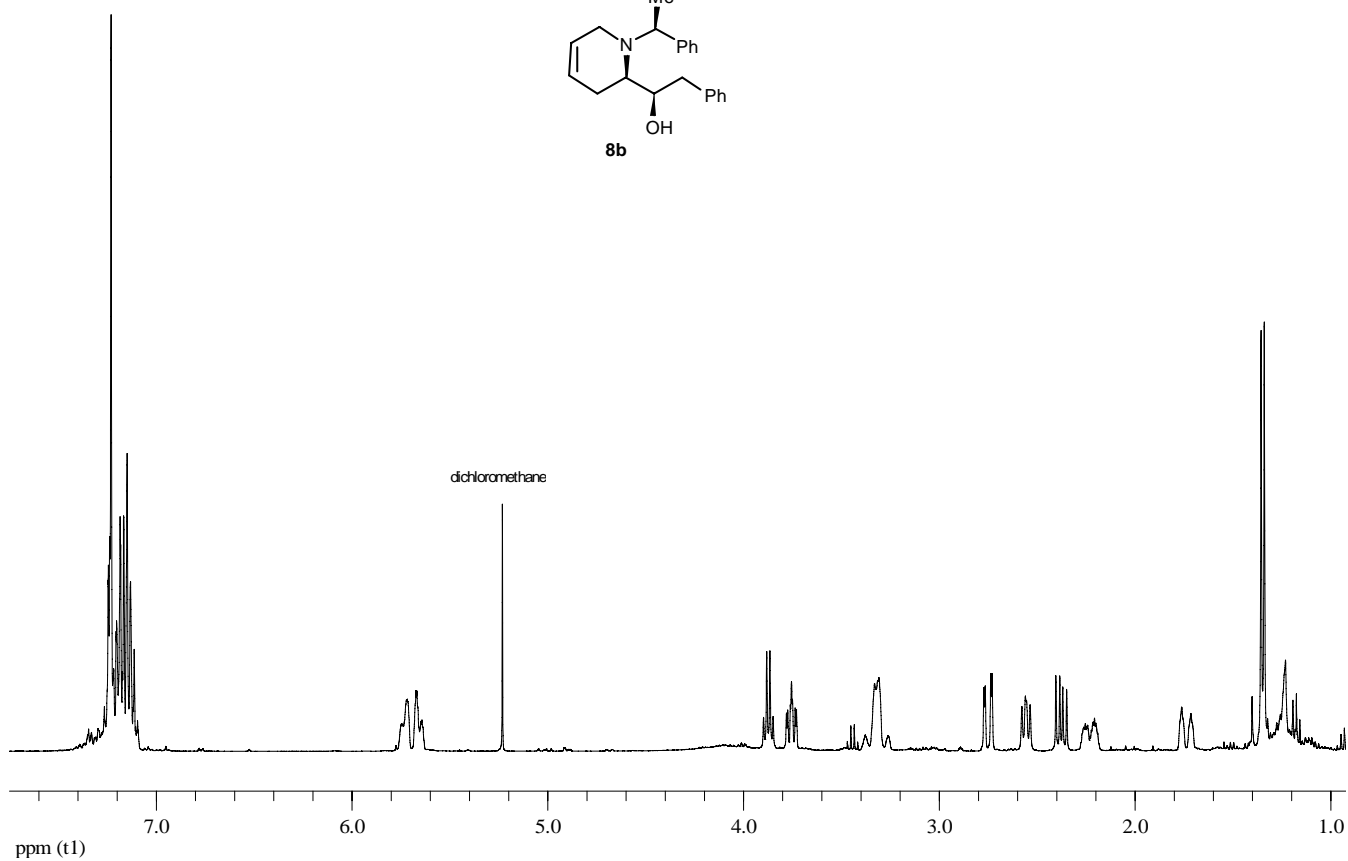

<sup>1</sup>H NMR 400 MHz, rt, CDCl<sub>3</sub>

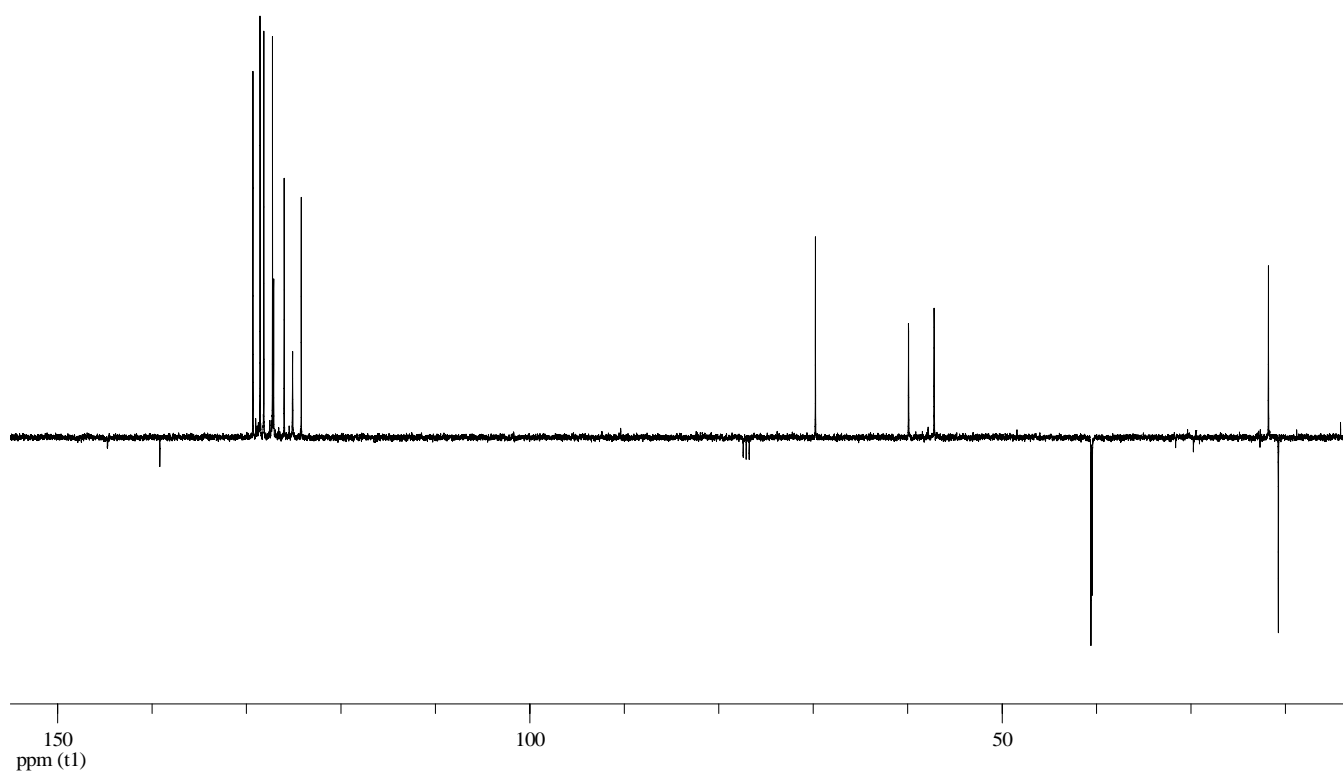

<sup>13</sup>C NMR 100 MHz, rt, CDCl<sub>3</sub>

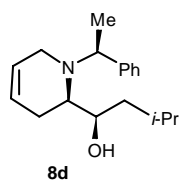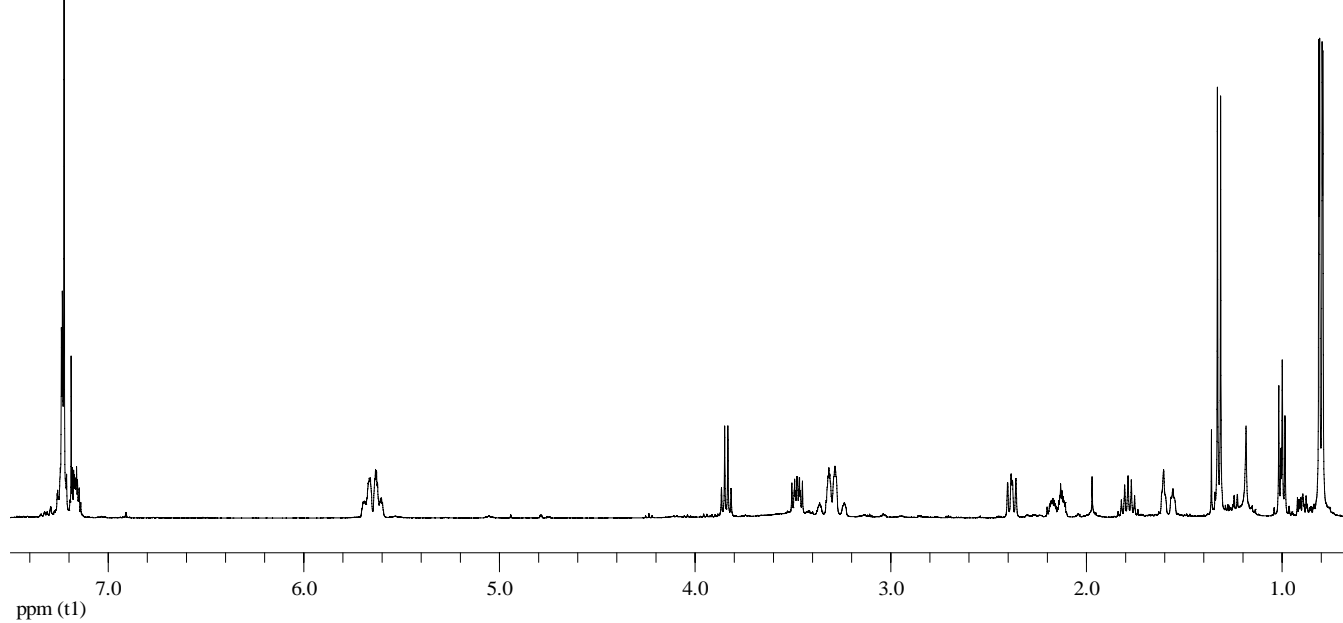

$^1\text{H NMR}$  400 MHz,  $\text{rt}$ ,  $\text{CDCl}_3$

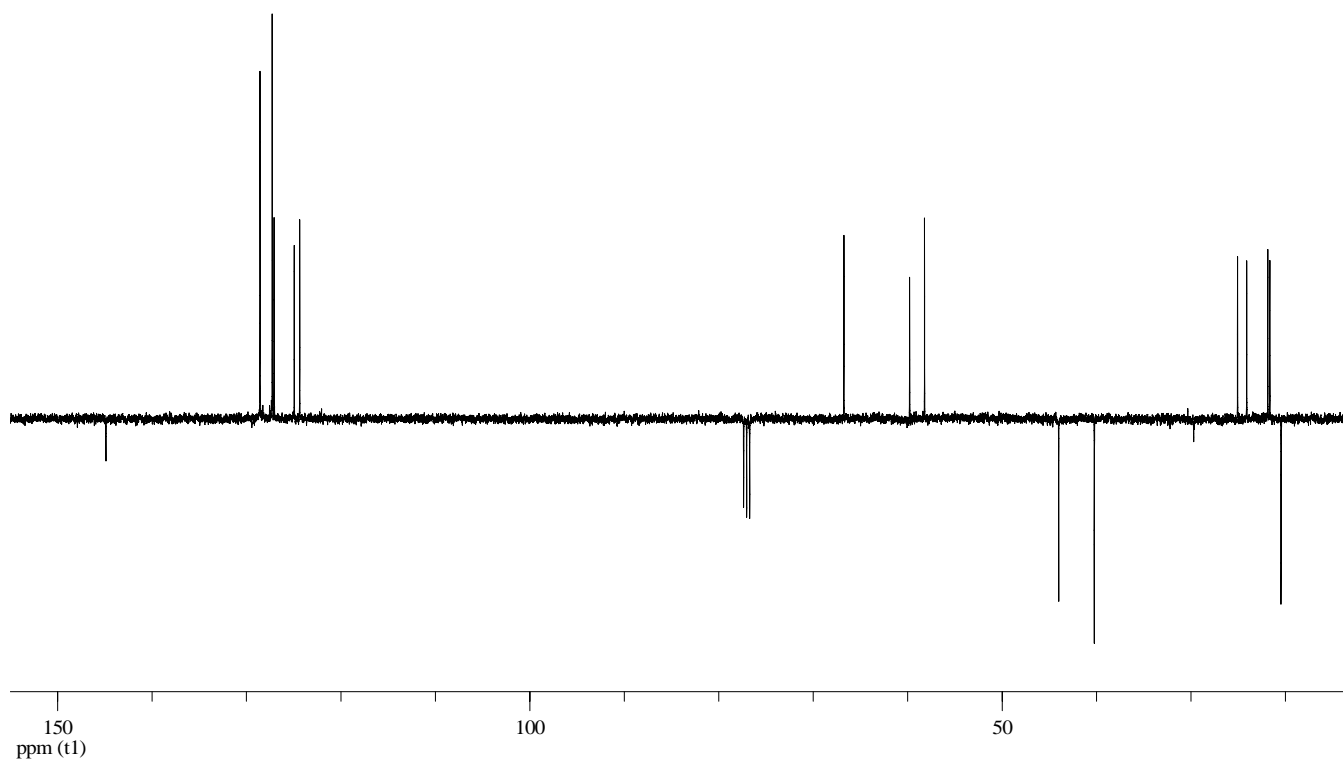

$^{13}\text{C NMR}$  100 MHz,  $\text{rt}$ ,  $\text{CDCl}_3$

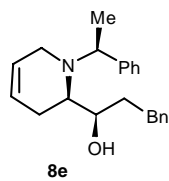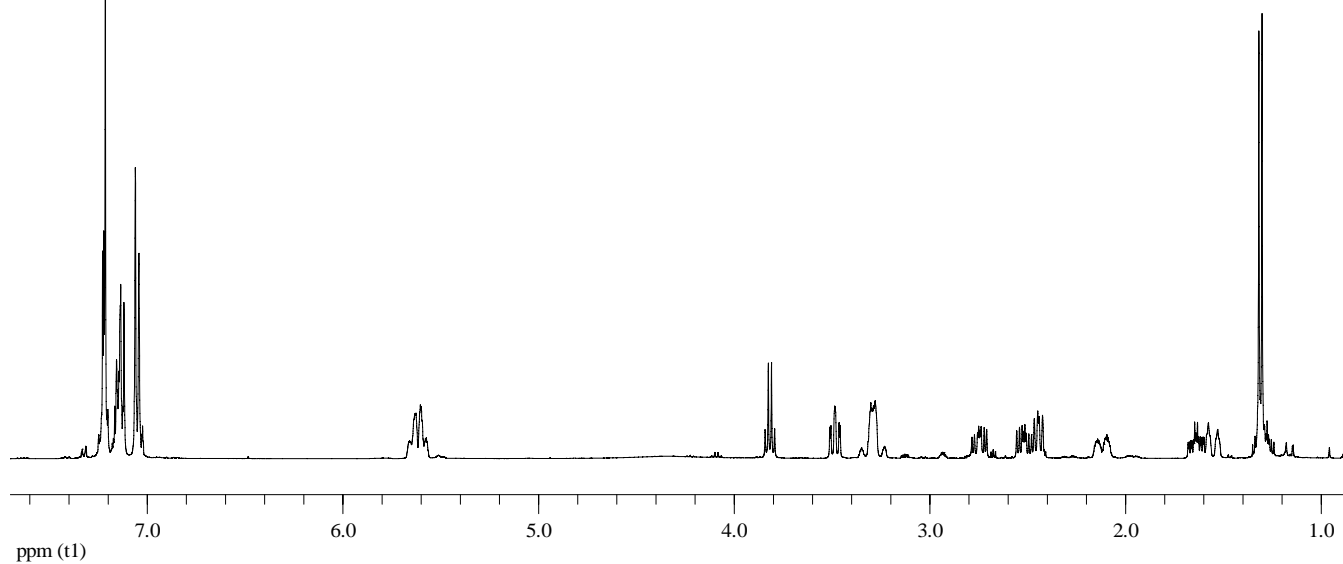

$^1\text{H}$  NMR 400 MHz, rt,  $\text{CDCl}_3$

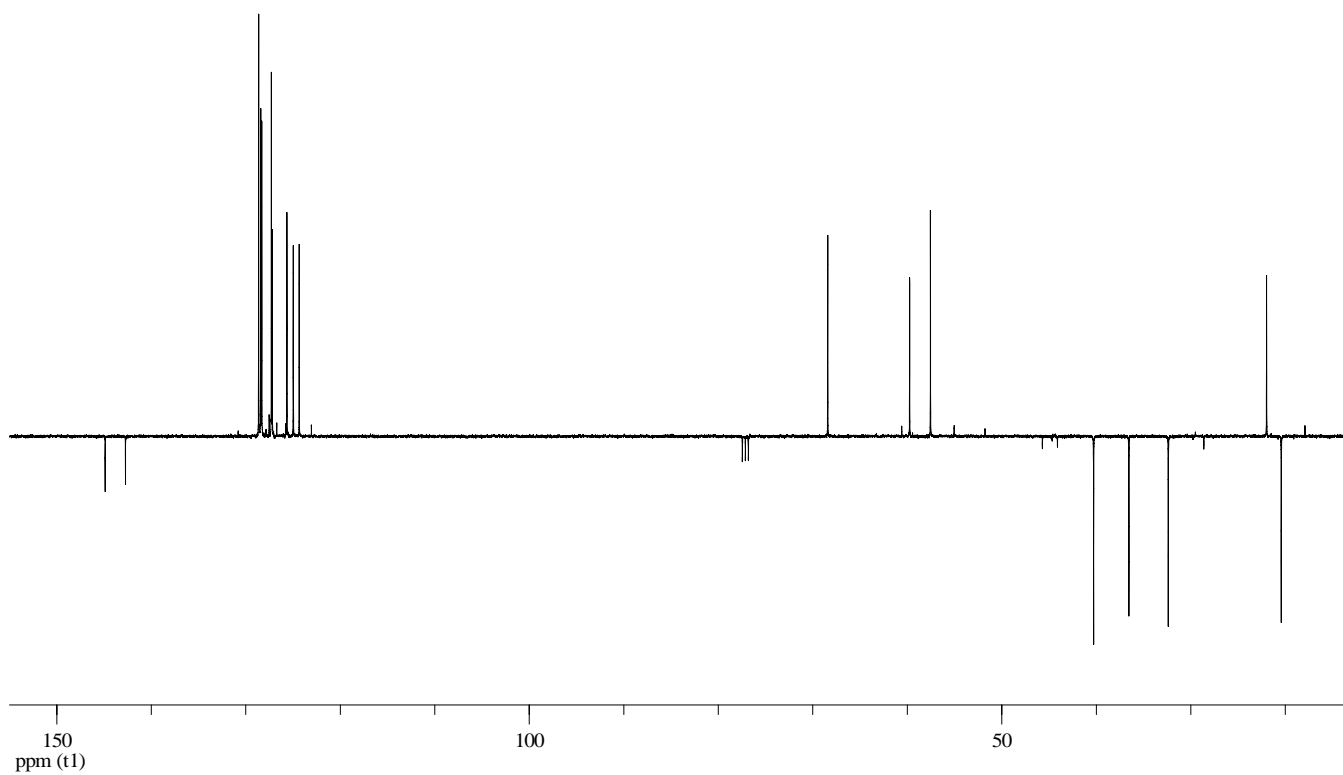

$^{13}\text{C}$  NMR 100 MHz, rt,  $\text{CDCl}_3$

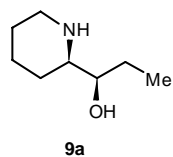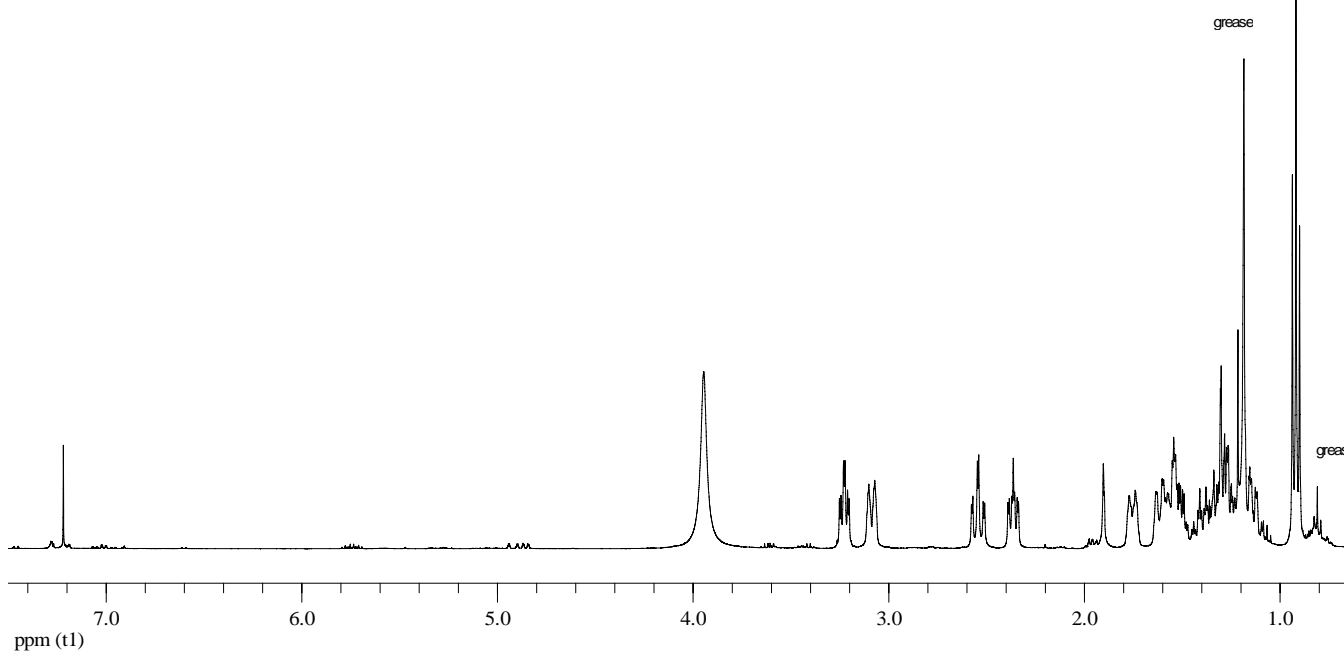

$^1\text{H}$  NMR 400 MHz, rt,  $\text{CDCl}_3$

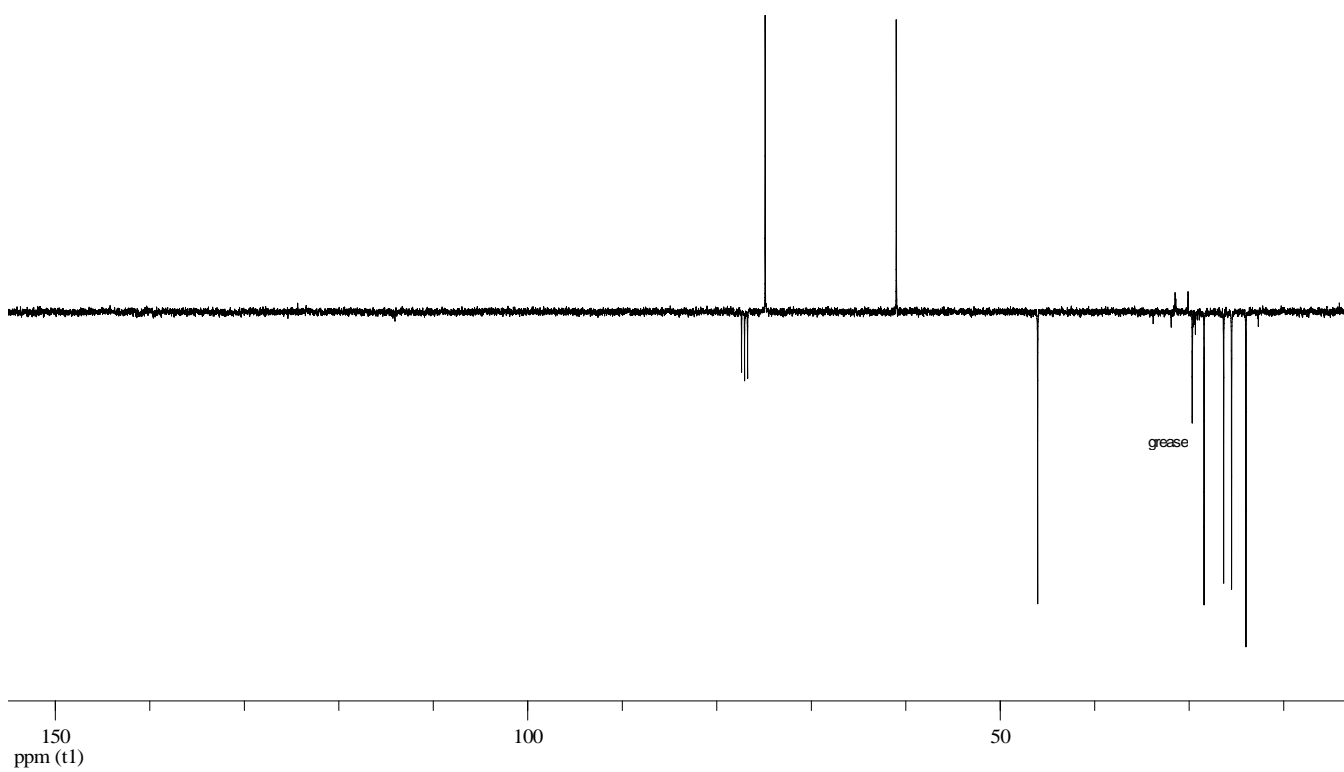

$^{13}\text{C}$  NMR 100 MHz, rt,  $\text{CDCl}_3$

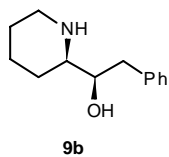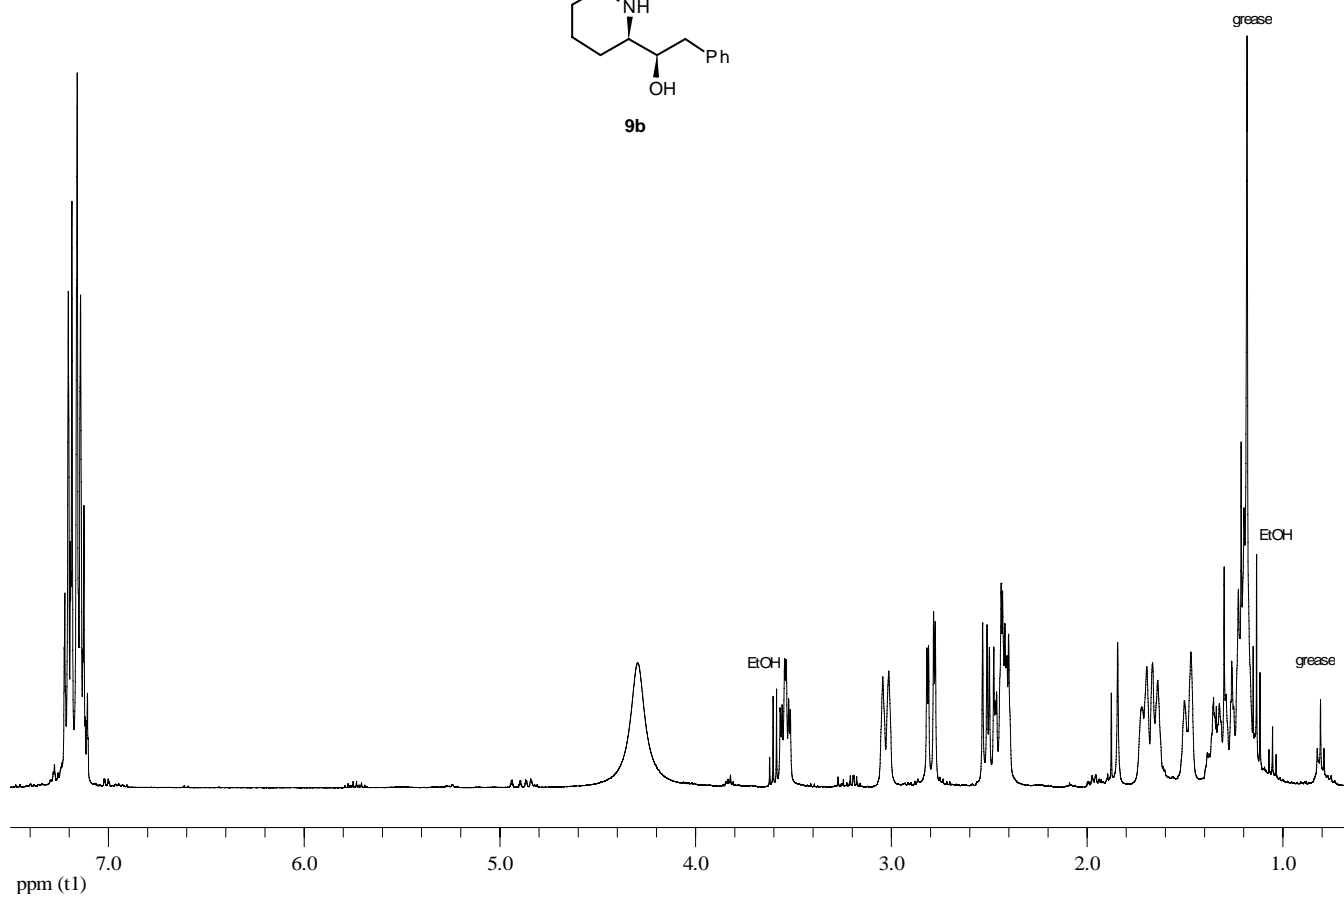

$^1\text{H}$  NMR 400 MHz, rt,  $\text{CDCl}_3$

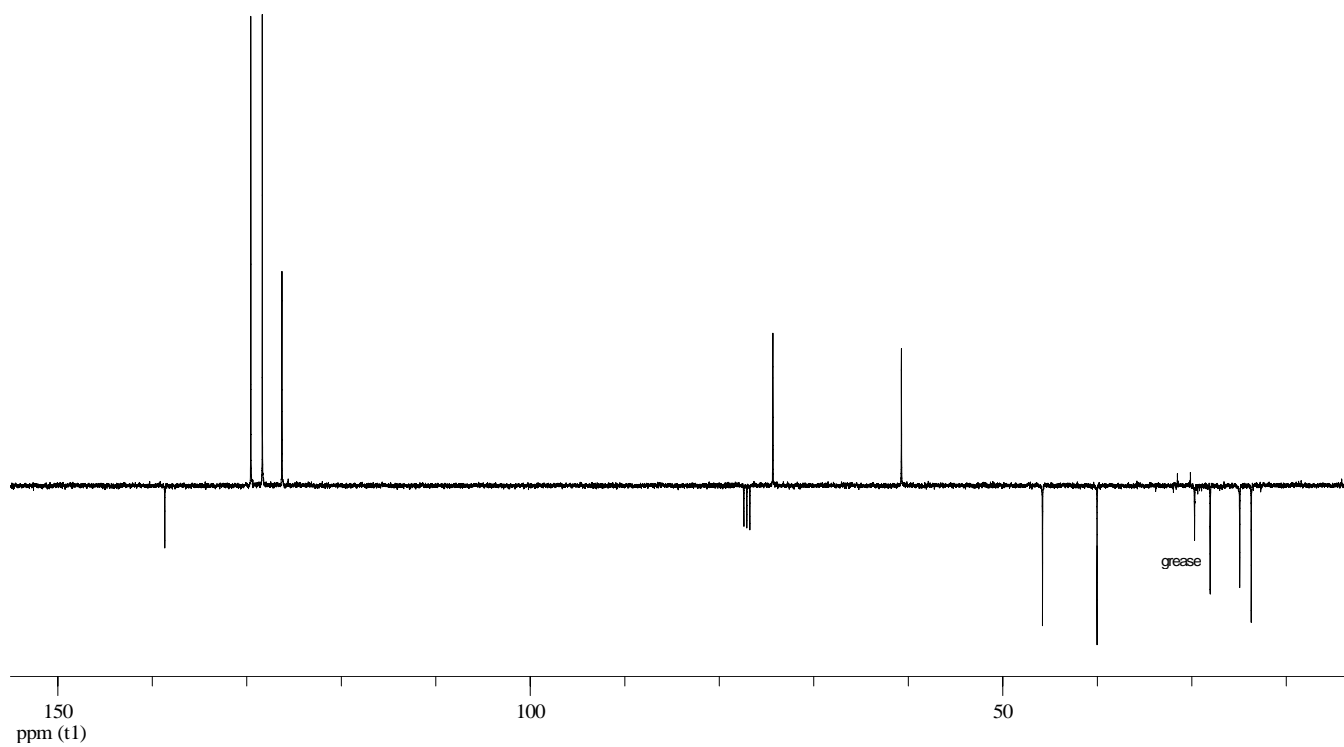

$^{13}\text{C}$  NMR 100 MHz, rt,  $\text{CDCl}_3$



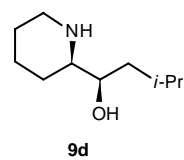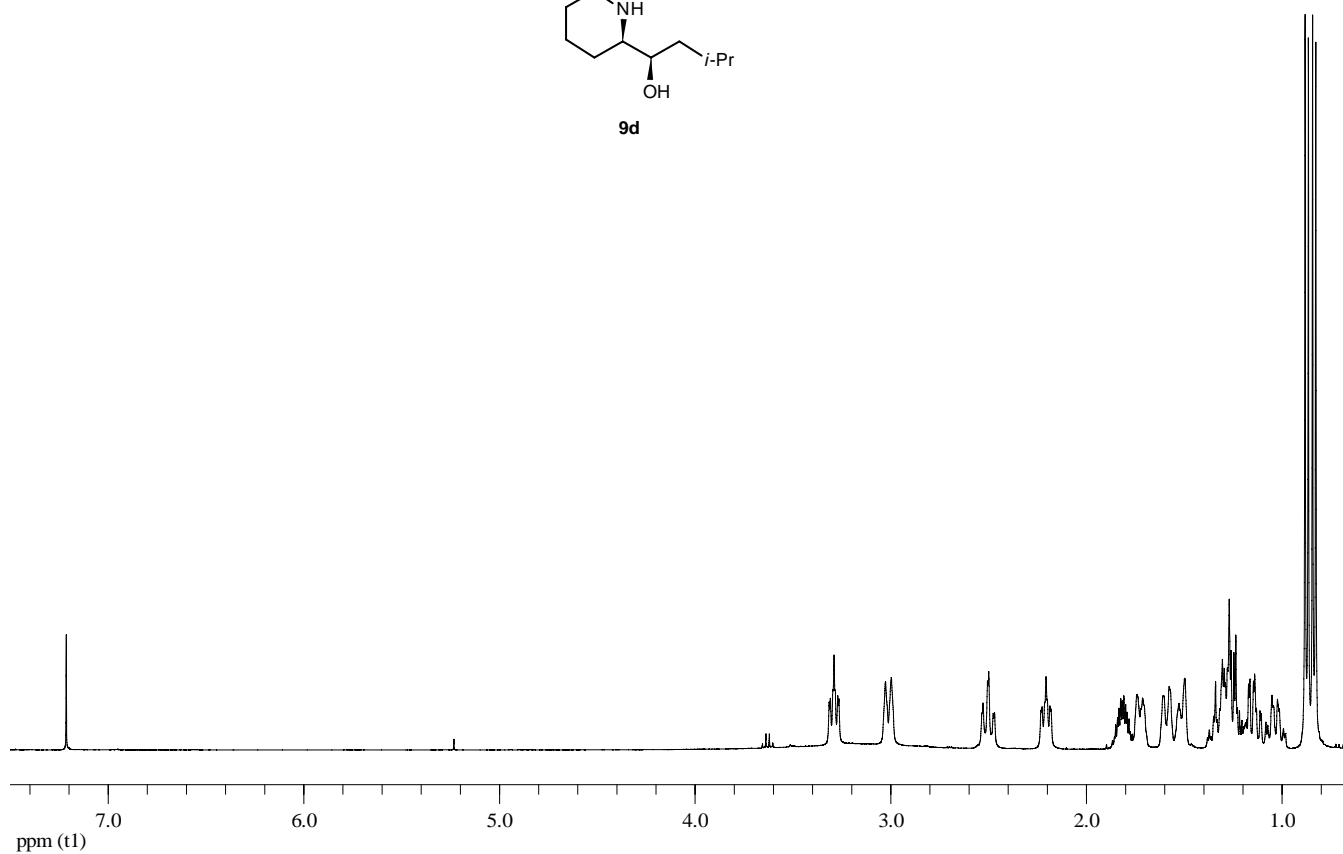

$^1\text{H}$  NMR 400 MHz, rt,  $\text{CDCl}_3$

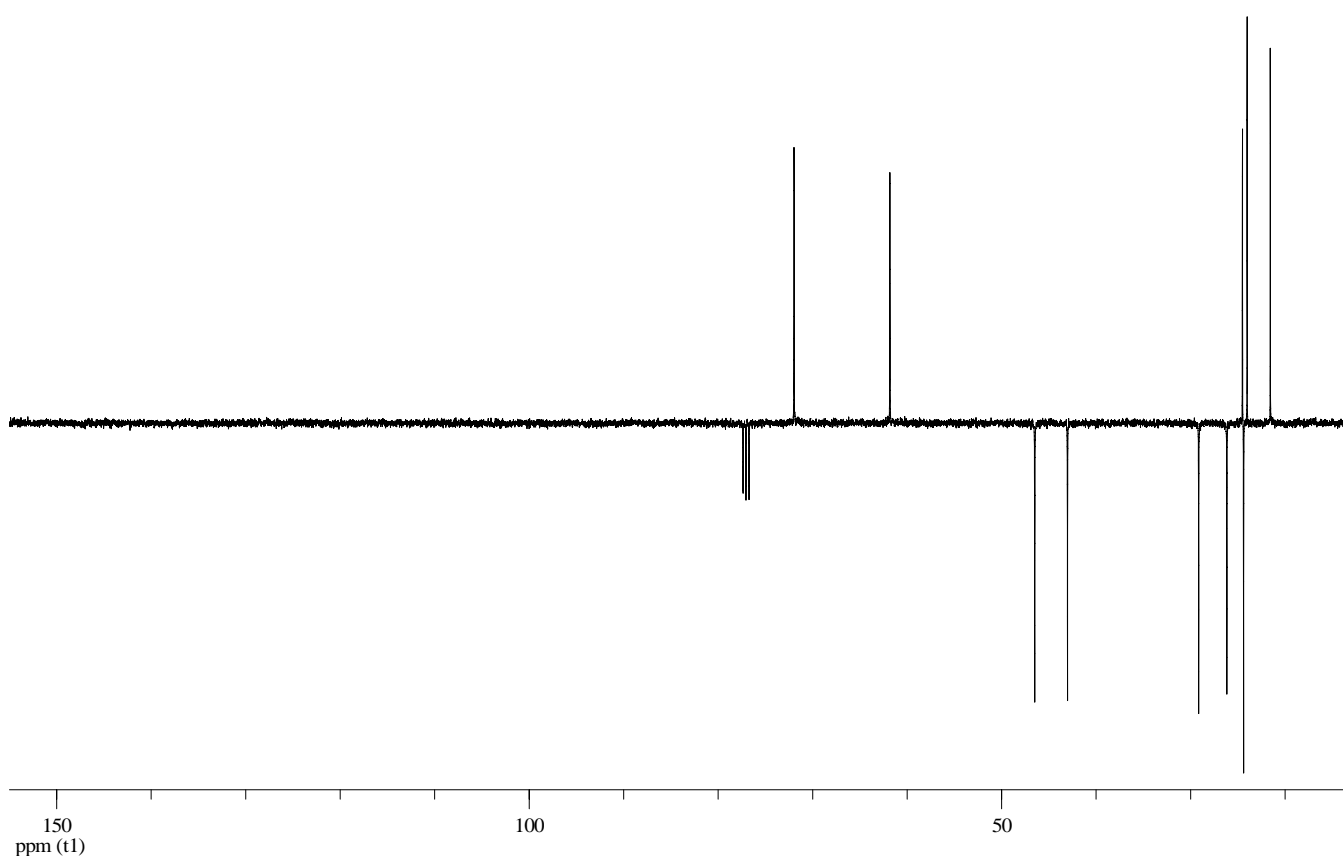

$^{13}\text{C}$  NMR 100 MHz, rt,  $\text{CDCl}_3$

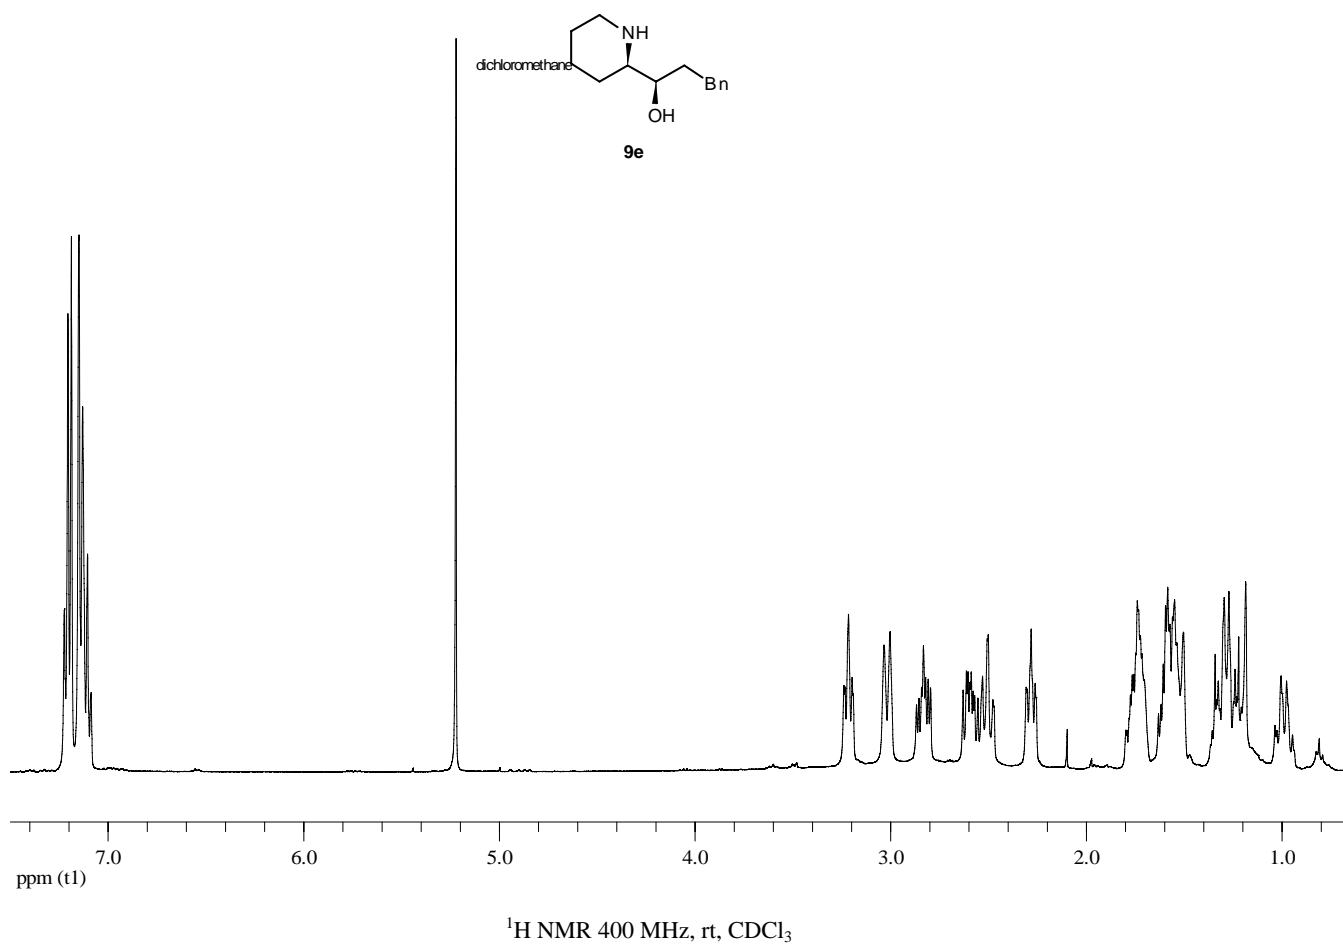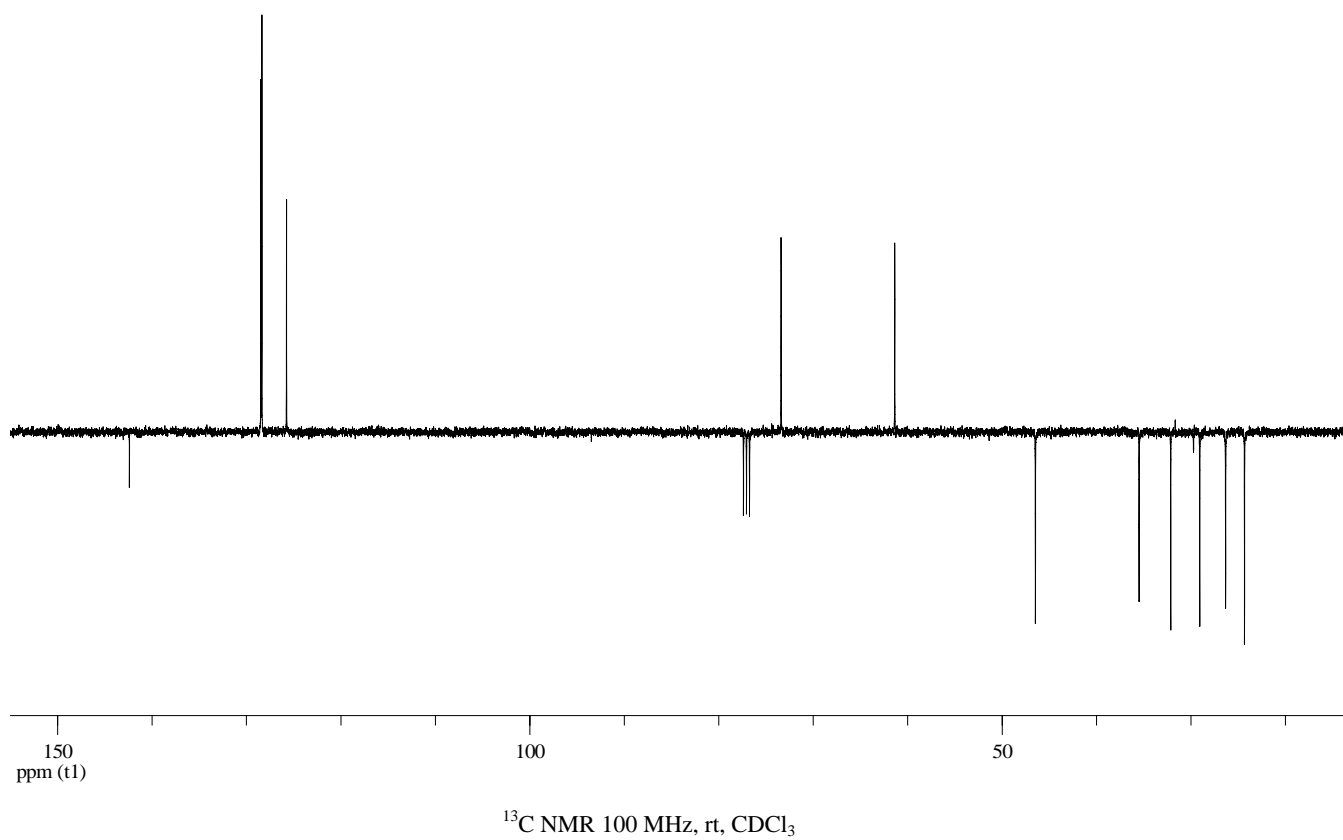

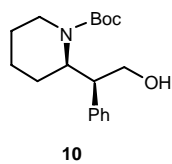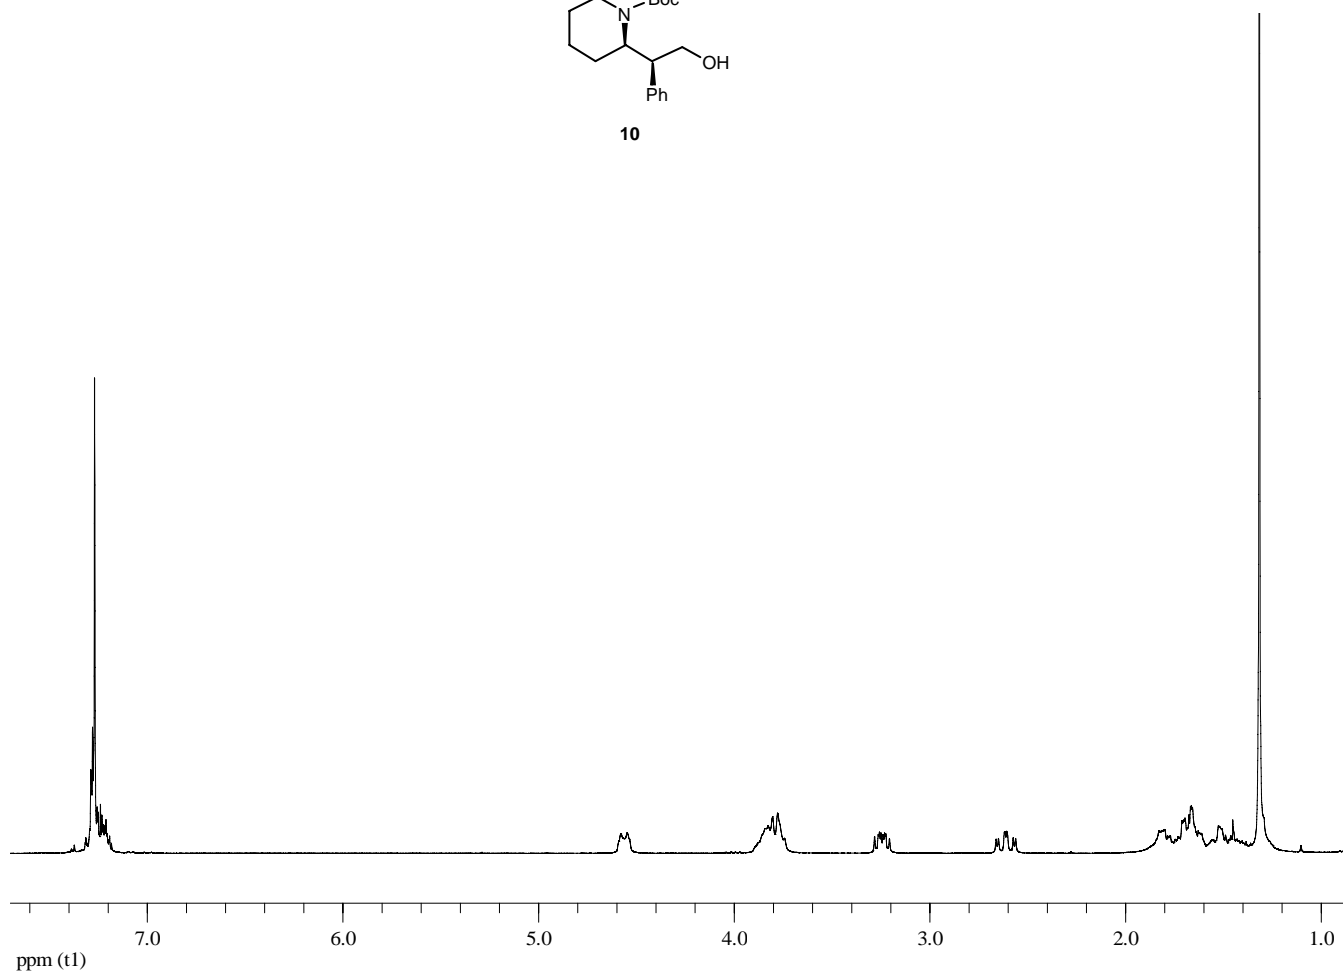

$^1\text{H}$  NMR 300 MHz, 333 K,  $\text{CDCl}_3$

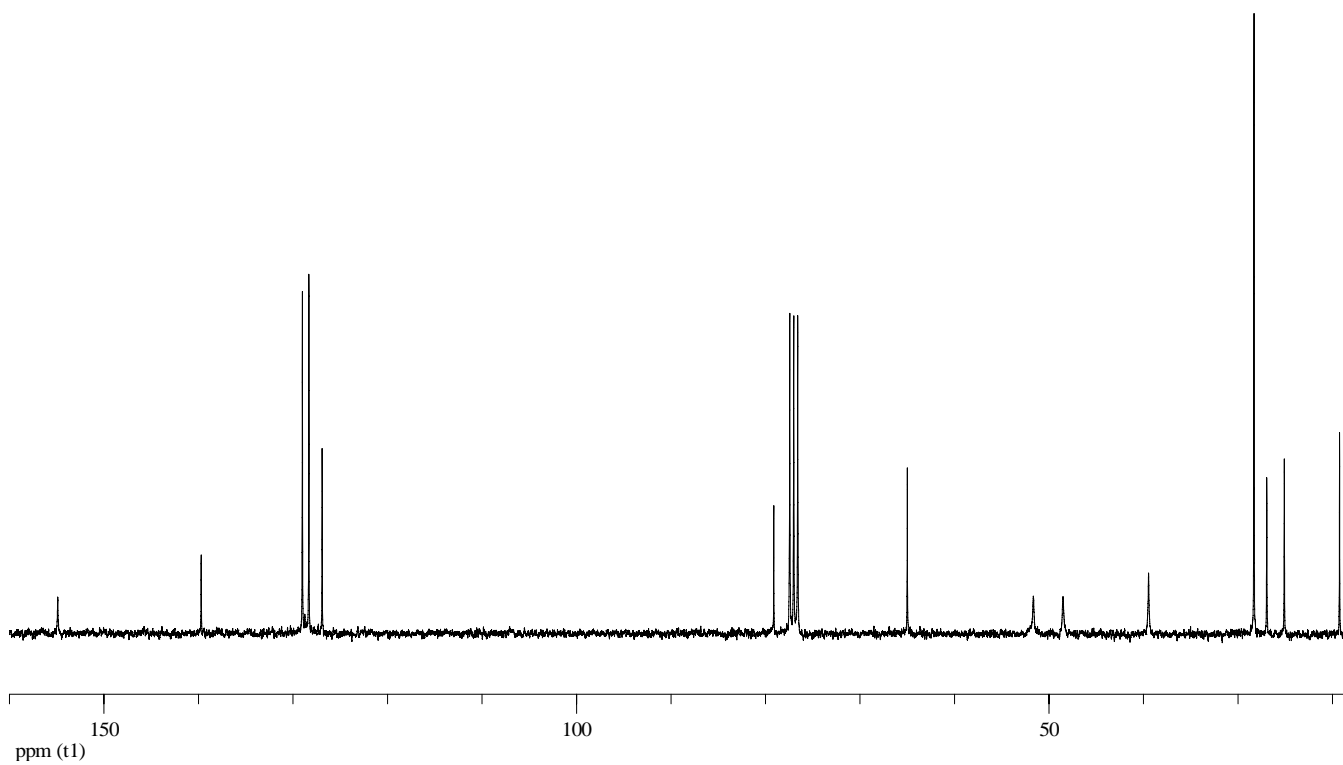

$^{13}\text{C}$  NMR 75 MHz, 333K,  $\text{CDCl}_3$

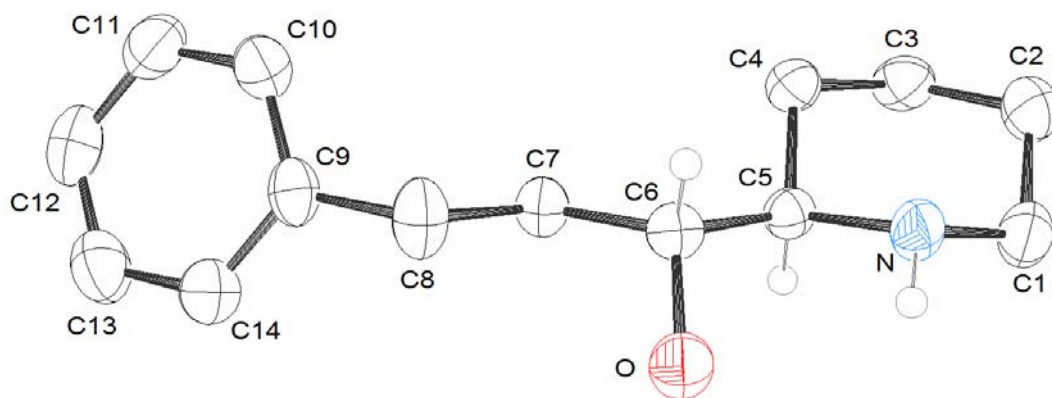

ORTEP drawing of compound **9e**. Thermal ellipsoids are at 50% probability level.
